# Supplementary material for: Genomic analysis of high pathogenicity avian influenza viruses from Antarctica reveals multiple introductions from South America
Source: Research Square preprint supplement (doi:10.21203/rs.3.rs-6727501/v1), 2025-06-12

## Host

- Poultry
- Wild bird
- △ Wild mammal
- ▽ Human

## Location

- Antarctica
- Falkland (Malvinas) Islands
- South Georgia
- Argentina
- Bolivia
- Brazil
- Chile
- Colombia
- Ecuador
- Peru
- Uruguay

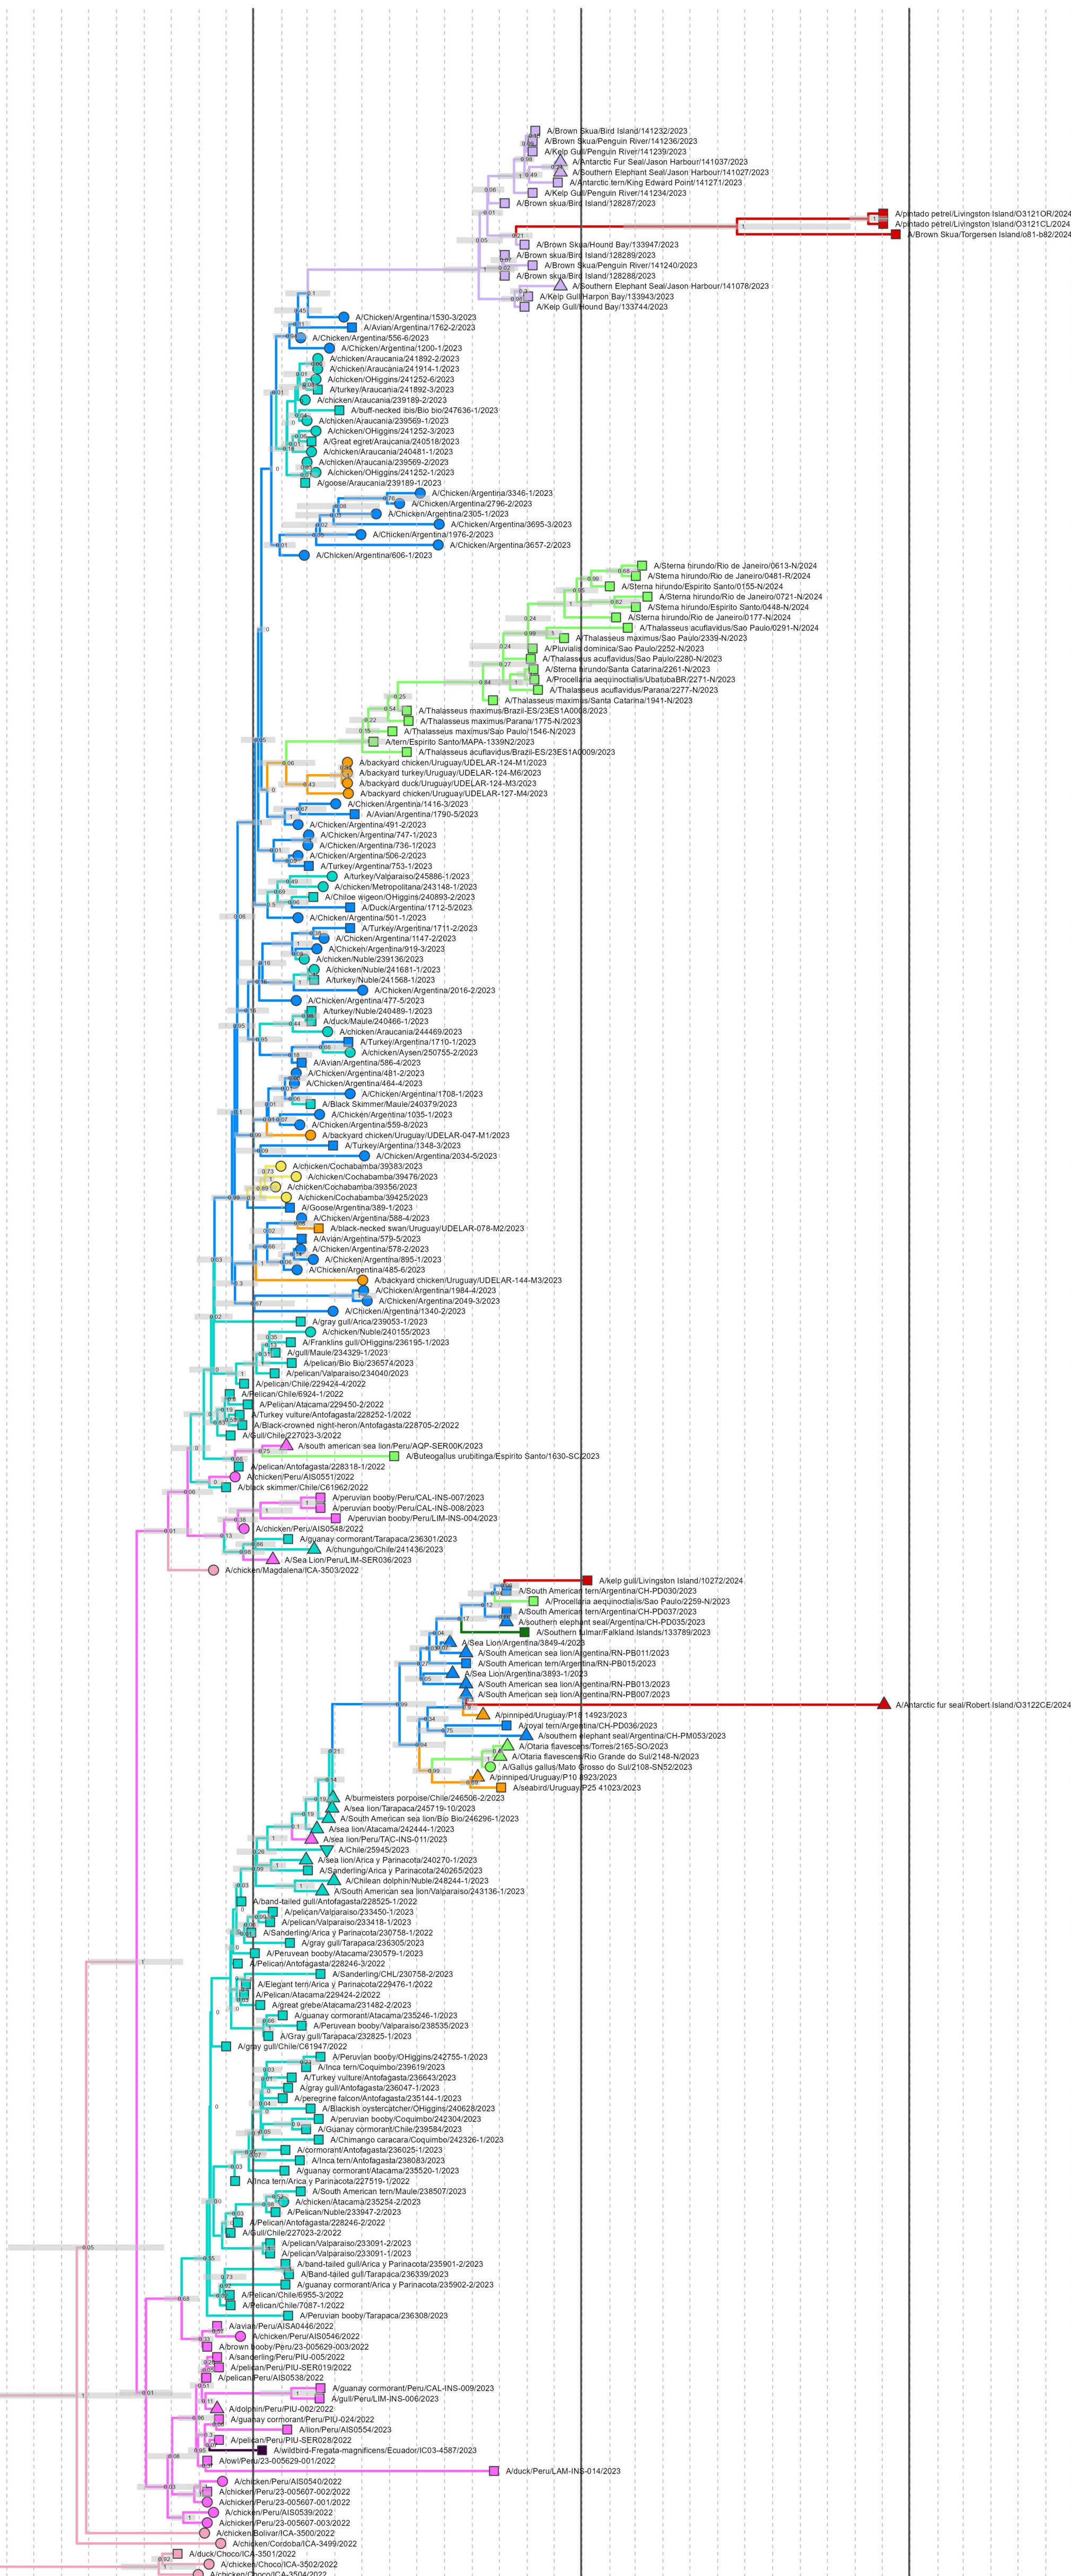

2020.

2020.5

021.0

2021.5

022.0

2022.5

2023

202

20

---

---

---



## Host

- Poultry
- Wild bird
- △ Wild mammal
- ▽ Human

## Location

- Antarctica
- Falkland (Malvinas) Islands
- South Georgia
- Argentina
- Bolivia
- Brazil
- Chile
- Colombia
- Ecuador
- Peru
- Uruguay

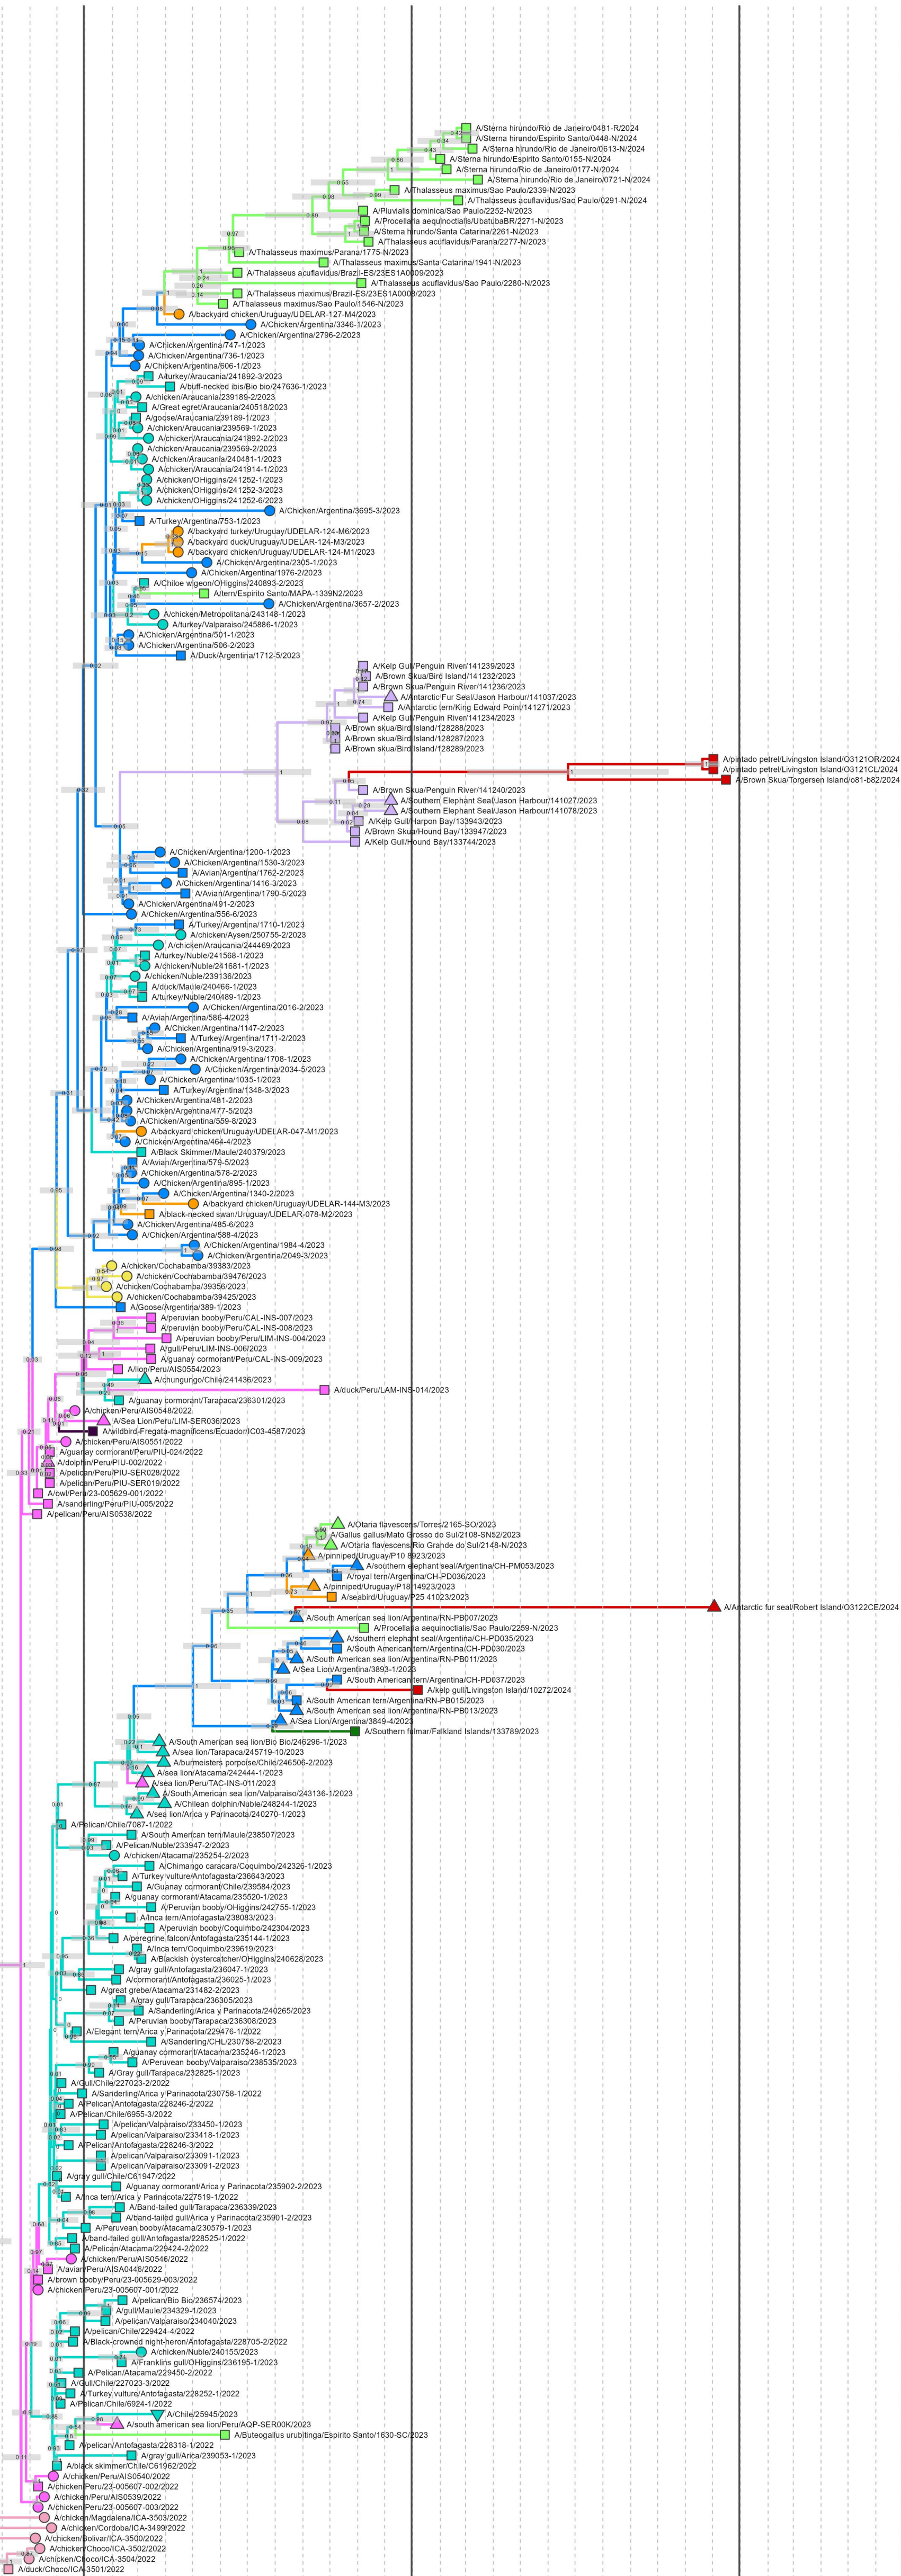

2020.

2020.5

021.0

2021.5

2022.

2022

---

---

---

24.0

---

---

---

.0

---



## Host

- Poultry
- Wild bird
- △ Wild mammal
- ▽ Human

## Location

- Antarctica
- Falkland (Malvinas) Islands
- South Georgia
- Argentina
- Bolivia
- Brazil
- Chile
- Colombia
- Ecuador
- Peru
- Uruguay

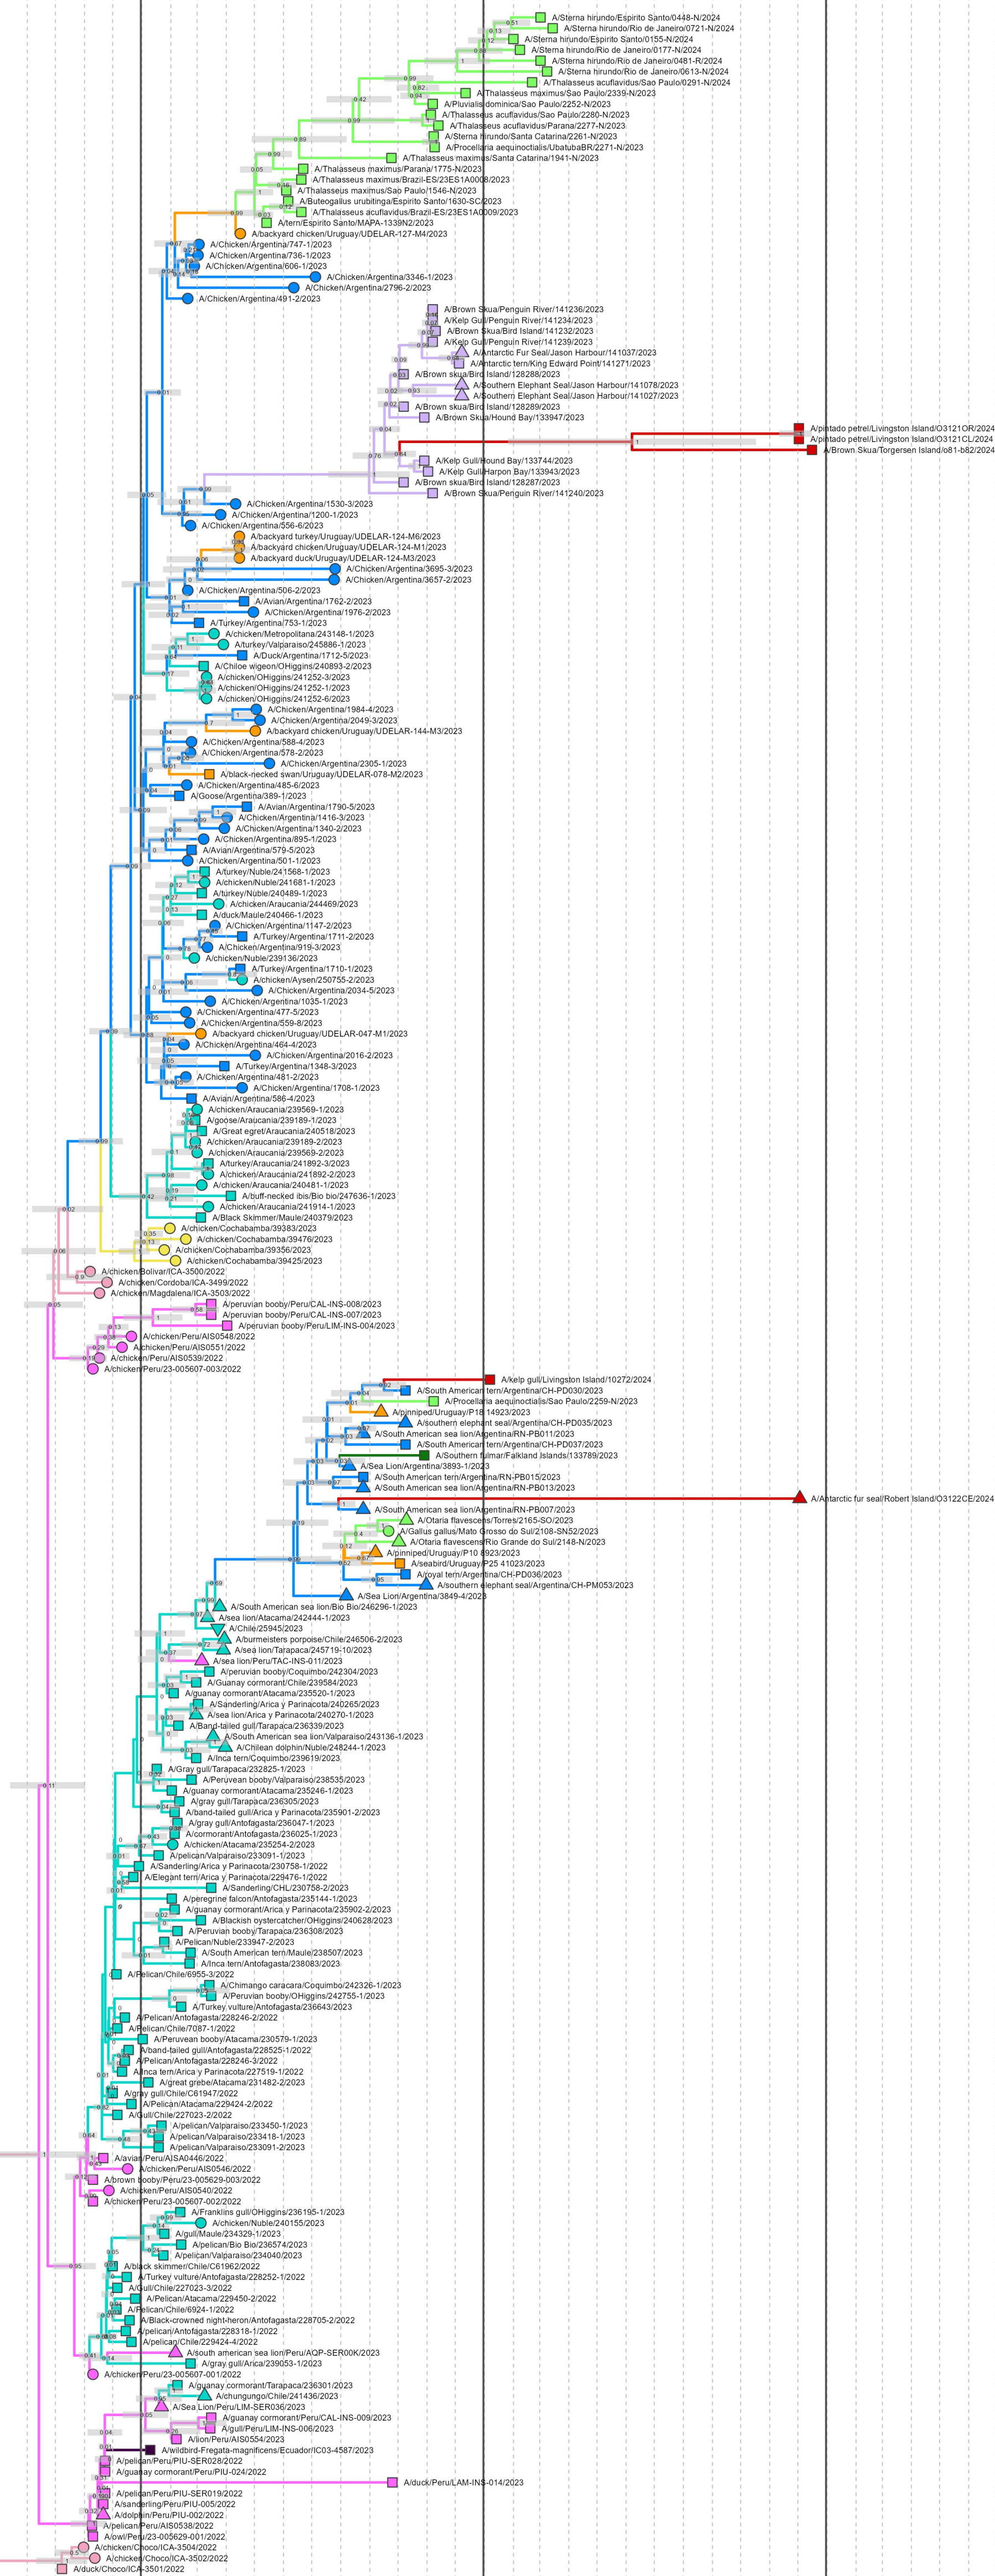

A horizontal timeline spanning from 2020.0 to 2025.0. Major ticks are labeled at intervals of 0.5 years: 2020.0, 2020.5, 2021.0, 2021.5, 2022.0, 2022.5, 2023.0, 2023.5, 2024.0, 2024.5, and 2025.0.



## Host

- Poultry
- Wild bird
- △ Wild mammal
- ▽ Human

## Location

- Antarctica
- Falkland (Malvinas) Islands
- South Georgia
- Argentina
- Bolivia
- Brazil
- Chile
- Colombia
- Ecuador
- Peru
- Uruguay

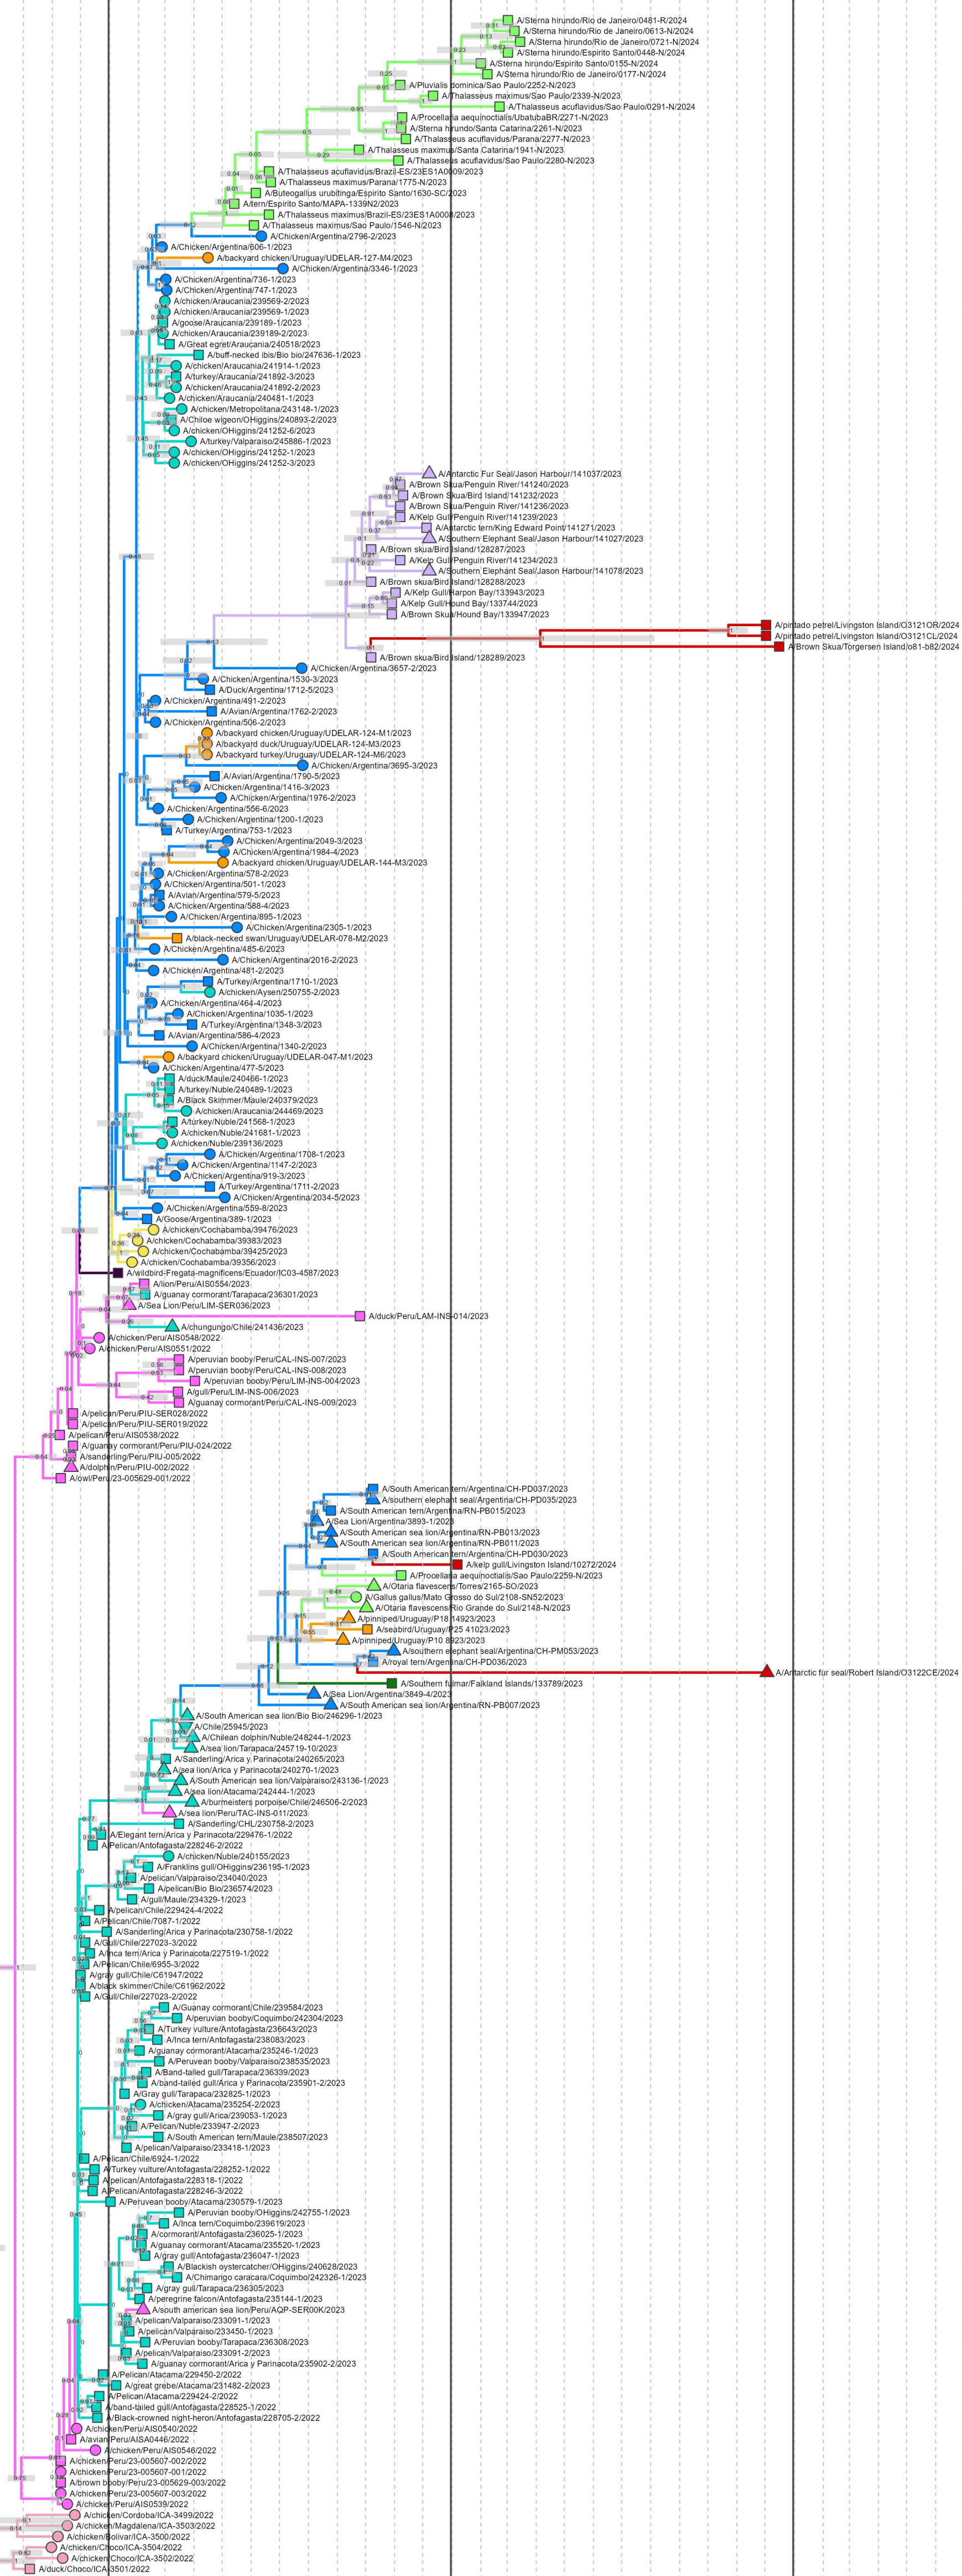

2020.

2020.5

2021.0

2021.5

2022.0

2022.5

2023.0

2023.5

2024.0

2024.5

2025.0

---



## Host

- Poultry
- Wild bird
- △ Wild mammal
- ▽ Human

### Location

- Antarctica
- Falkland (Malvinas) Islands
- South Georgia
- Argentina
- Bolivia
- Brazil
- Chile
- Colombia
- Ecuador
- Peru
- Uruguay

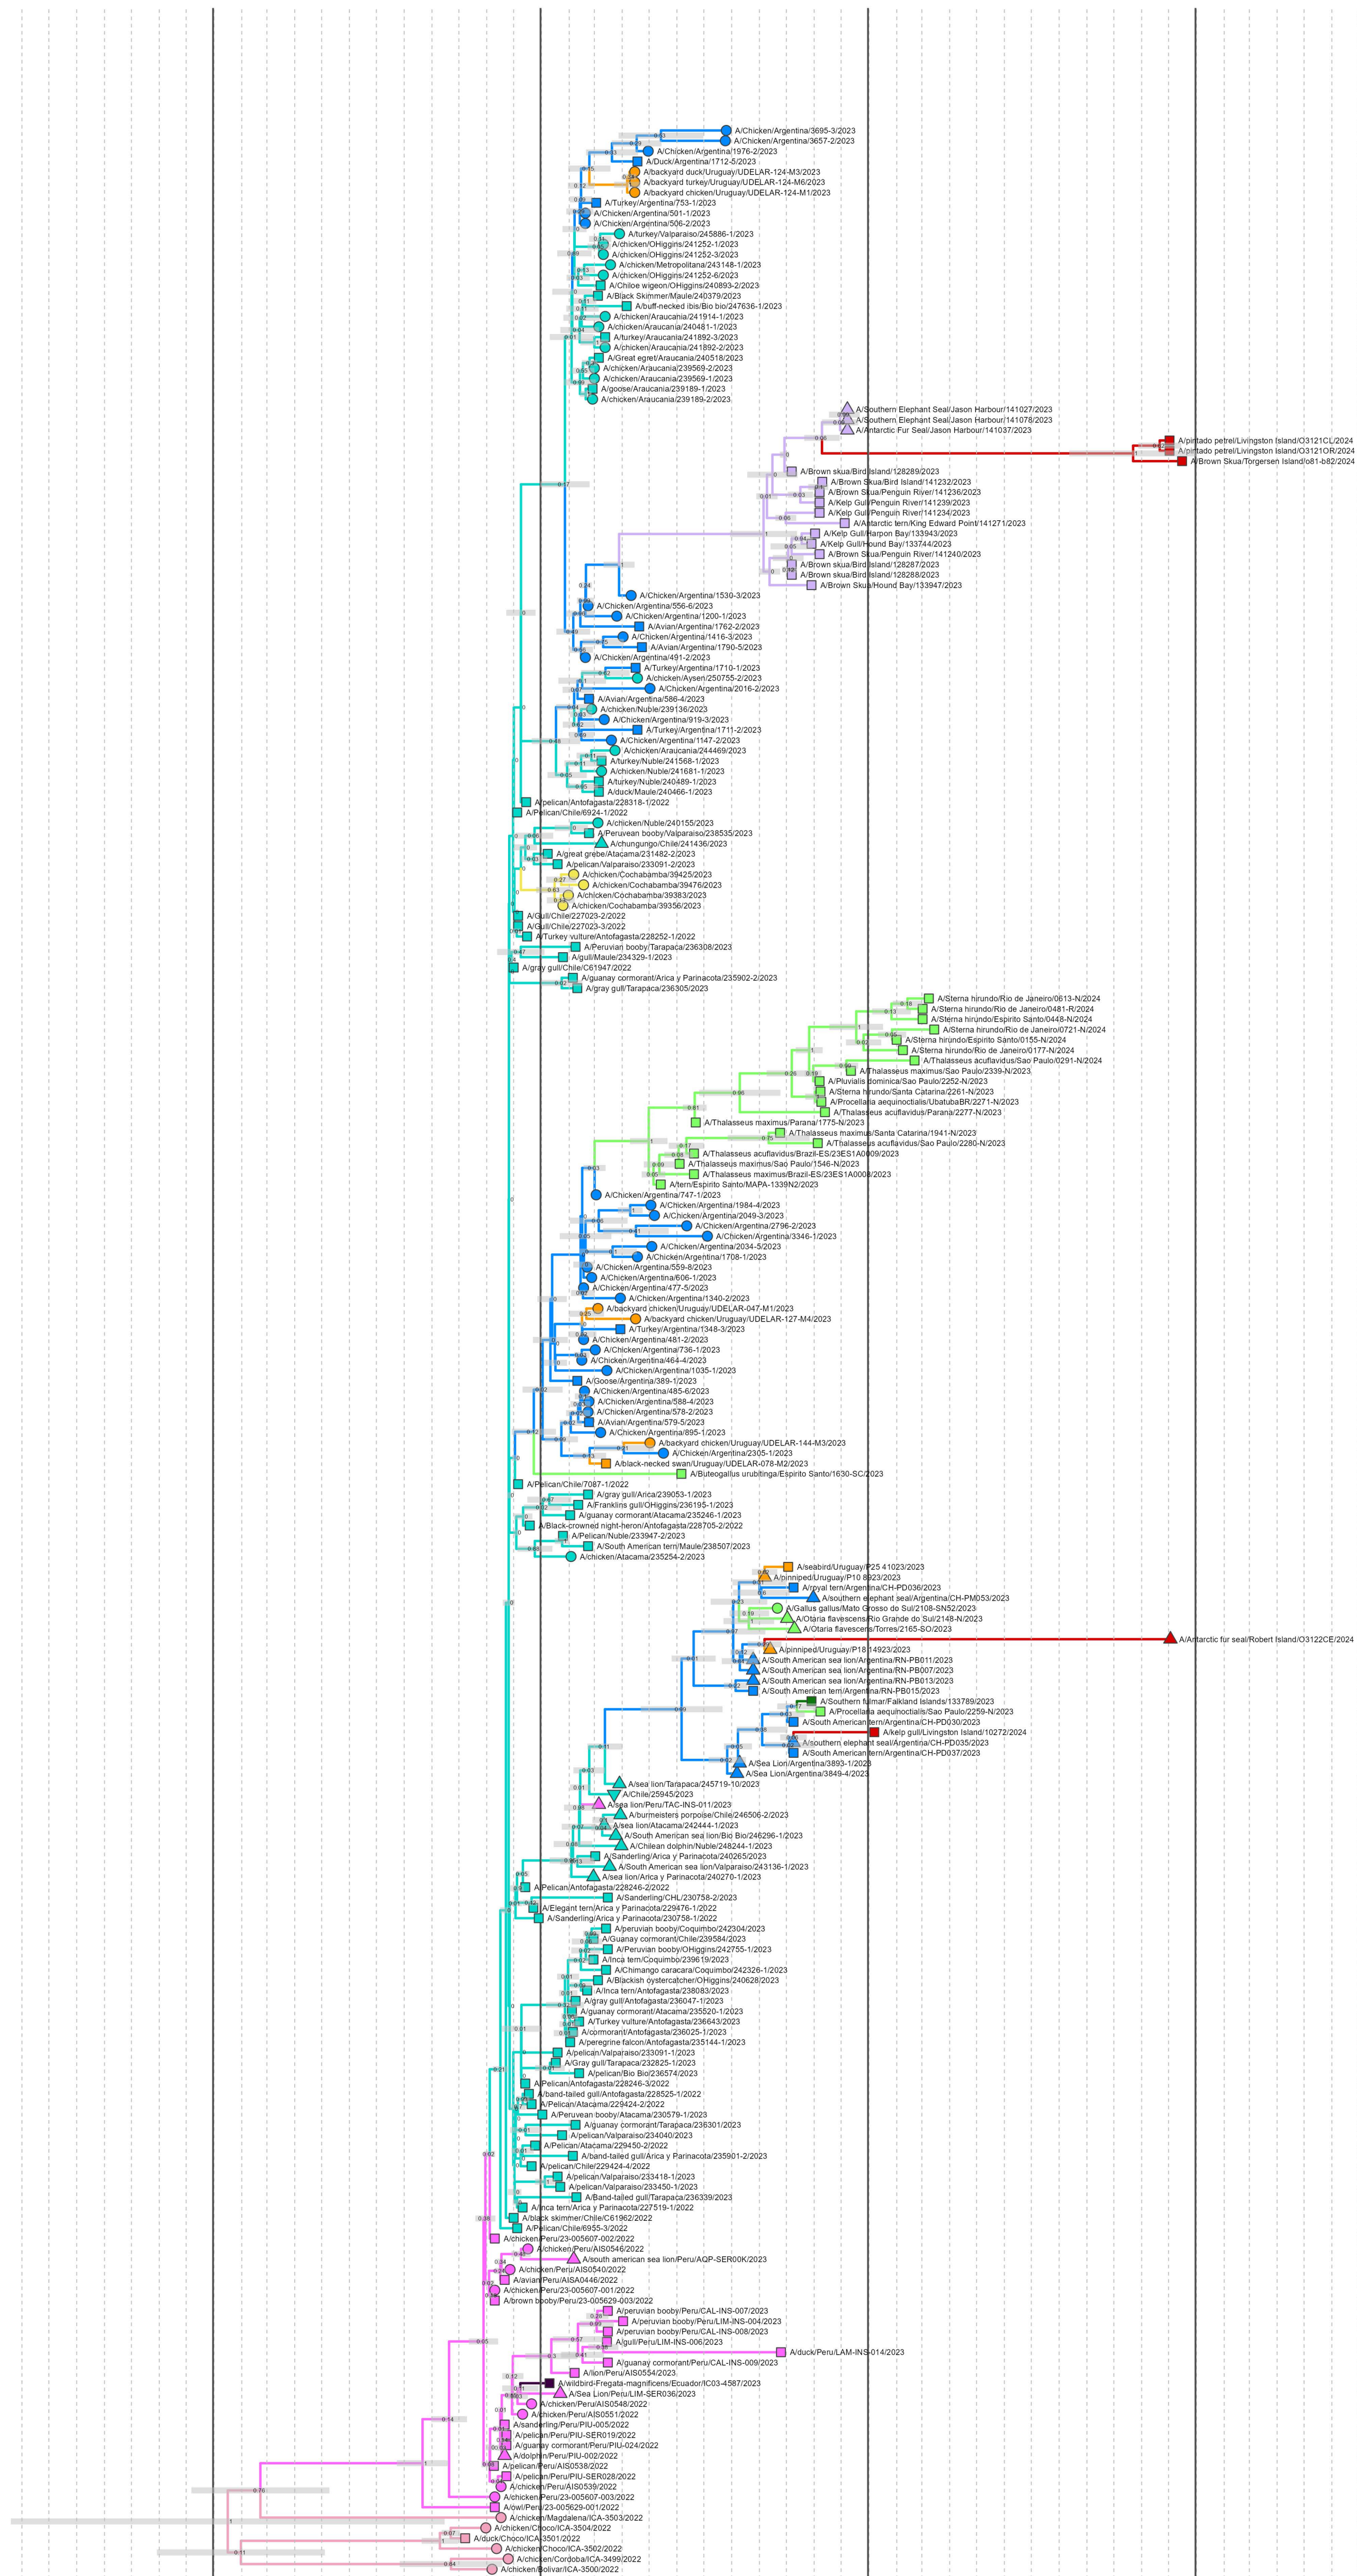

2020.

2020.5

021.0

2021.5

2022.0

2022.5

2023.

2023

2024

202

202

---



## Host

- Poultry
- Wild bird
- △ Wild mammal
- ▽ Human

## Location

- Antarctica
- Falkland (Malvinas) Islands
- South Georgia
- Argentina
- Bolivia
- Brazil
- Chile
- Colombia
- Ecuador
- Peru
- Uruguay

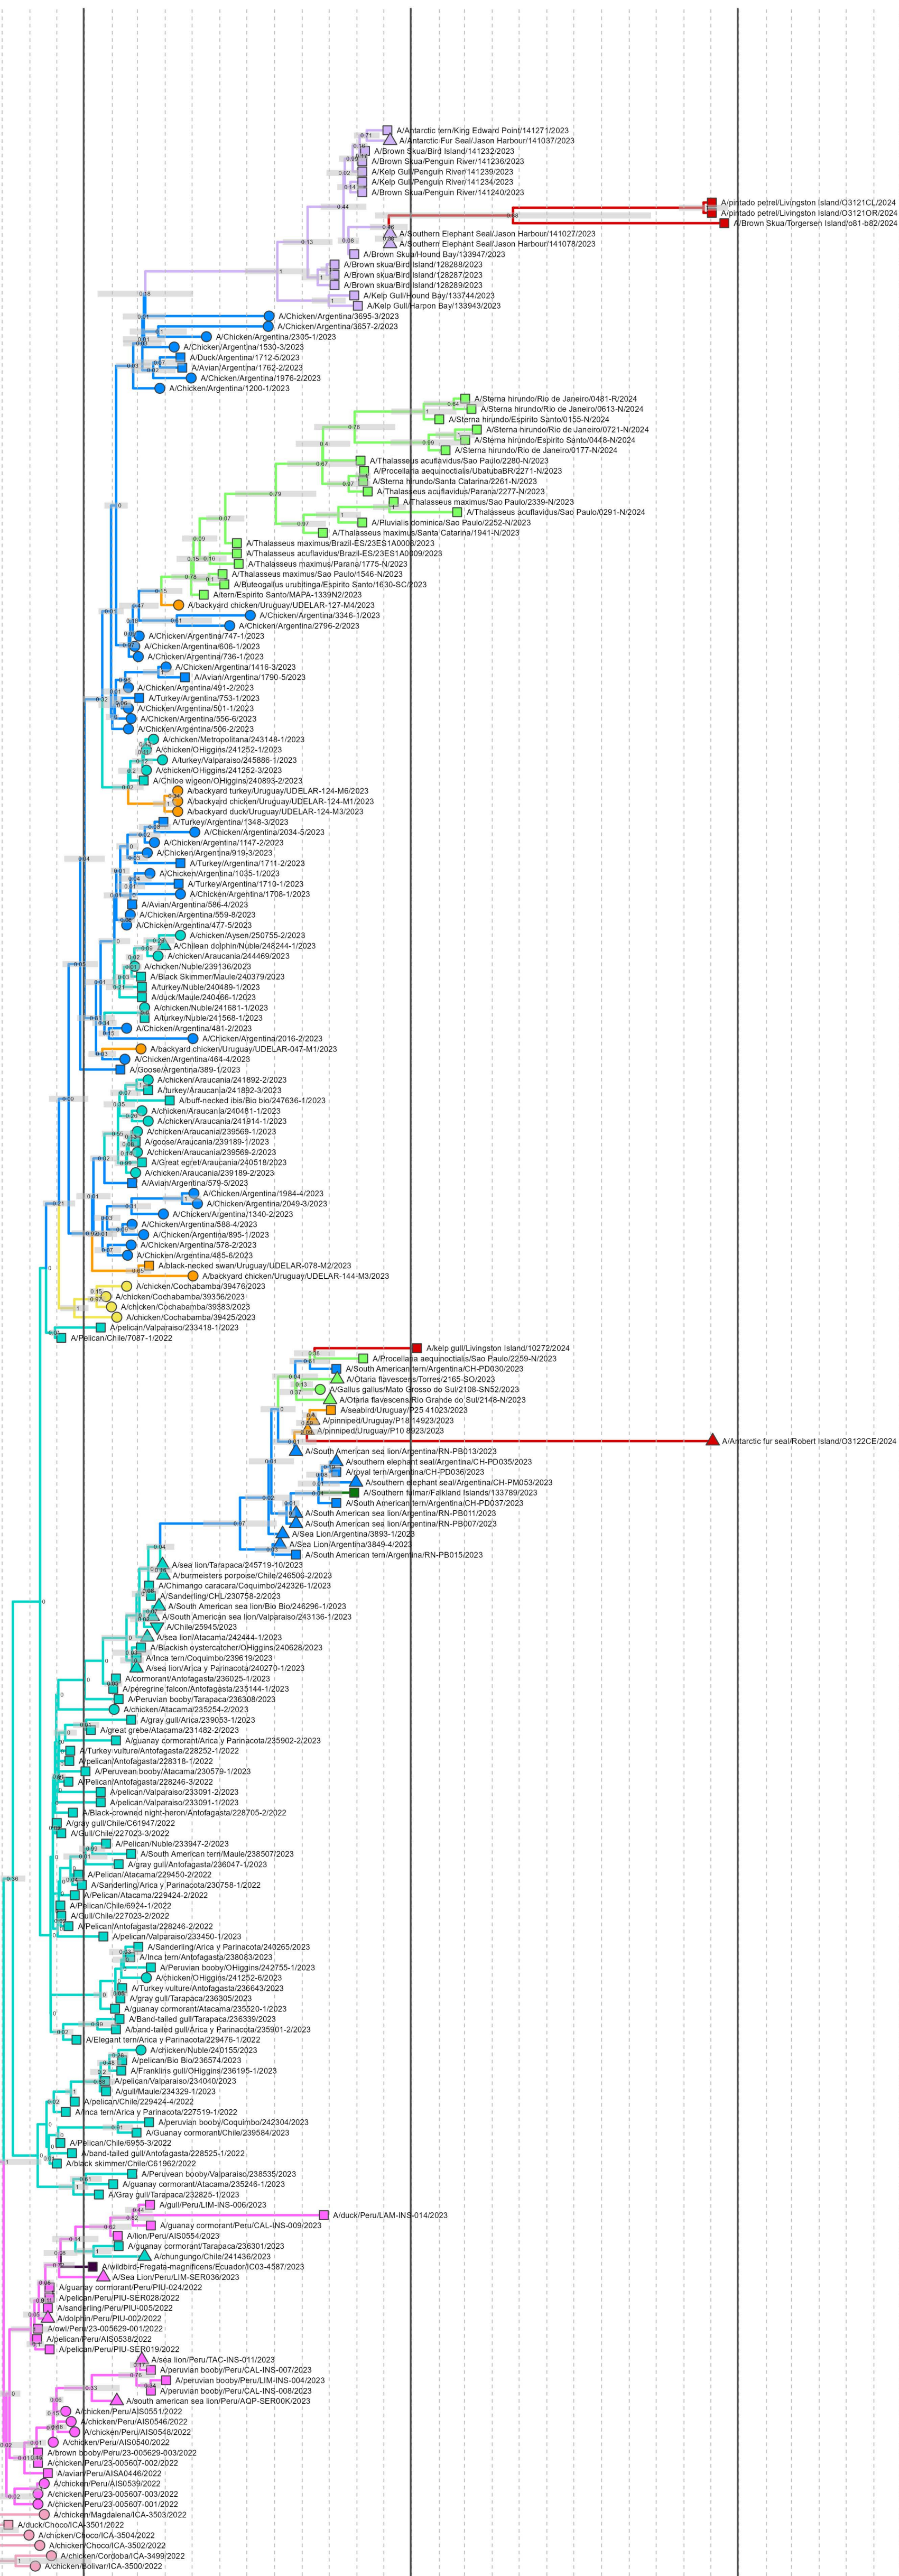

2020.

2020.5

2021.

2021

2021

202

---

---

---

---

---

2025.0

---



Host

- Poultry
- Wild bird
- Wild mammal
- Human

Location

- Antarctica
- Falkland (Malvinas) Islands
- South Georgia
- Argentina
- Bolivia
- Brazil
- Chile
- Colombia
- Ecuador
- Peru
- Uruguay

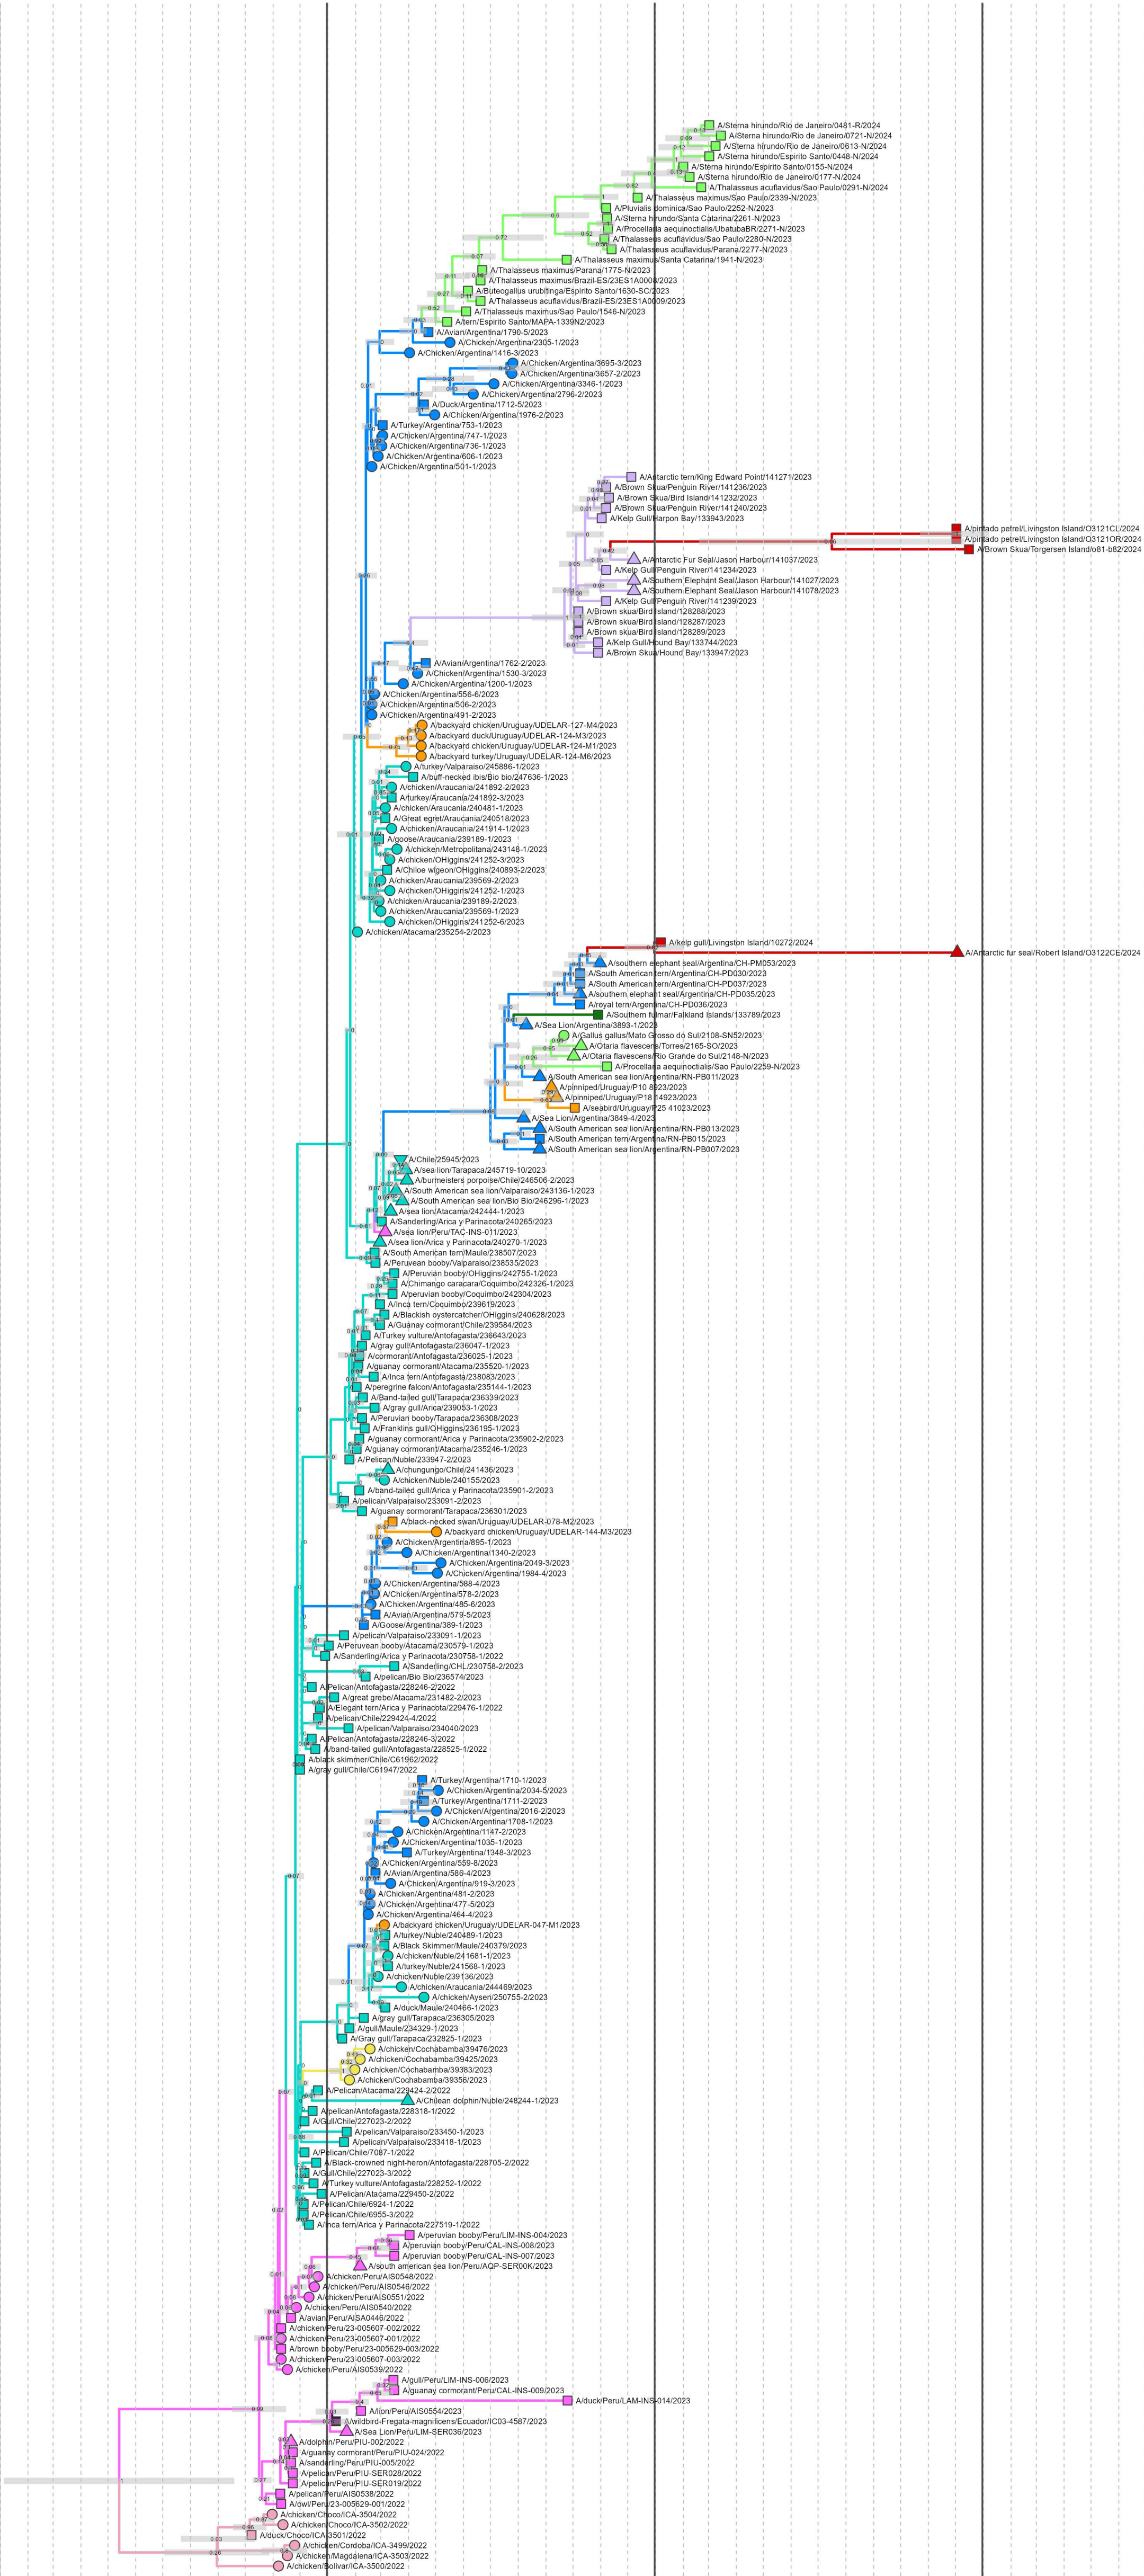



Host

- Poultry
- Wild bird
- Wild mammal
- Human

Location

- Antarctica
- Falkland (Malvinas) Islands
- South Georgia
- Argentina
- Bolivia
- Brazil
- Chile
- Colombia
- Ecuador
- Peru
- Uruguay

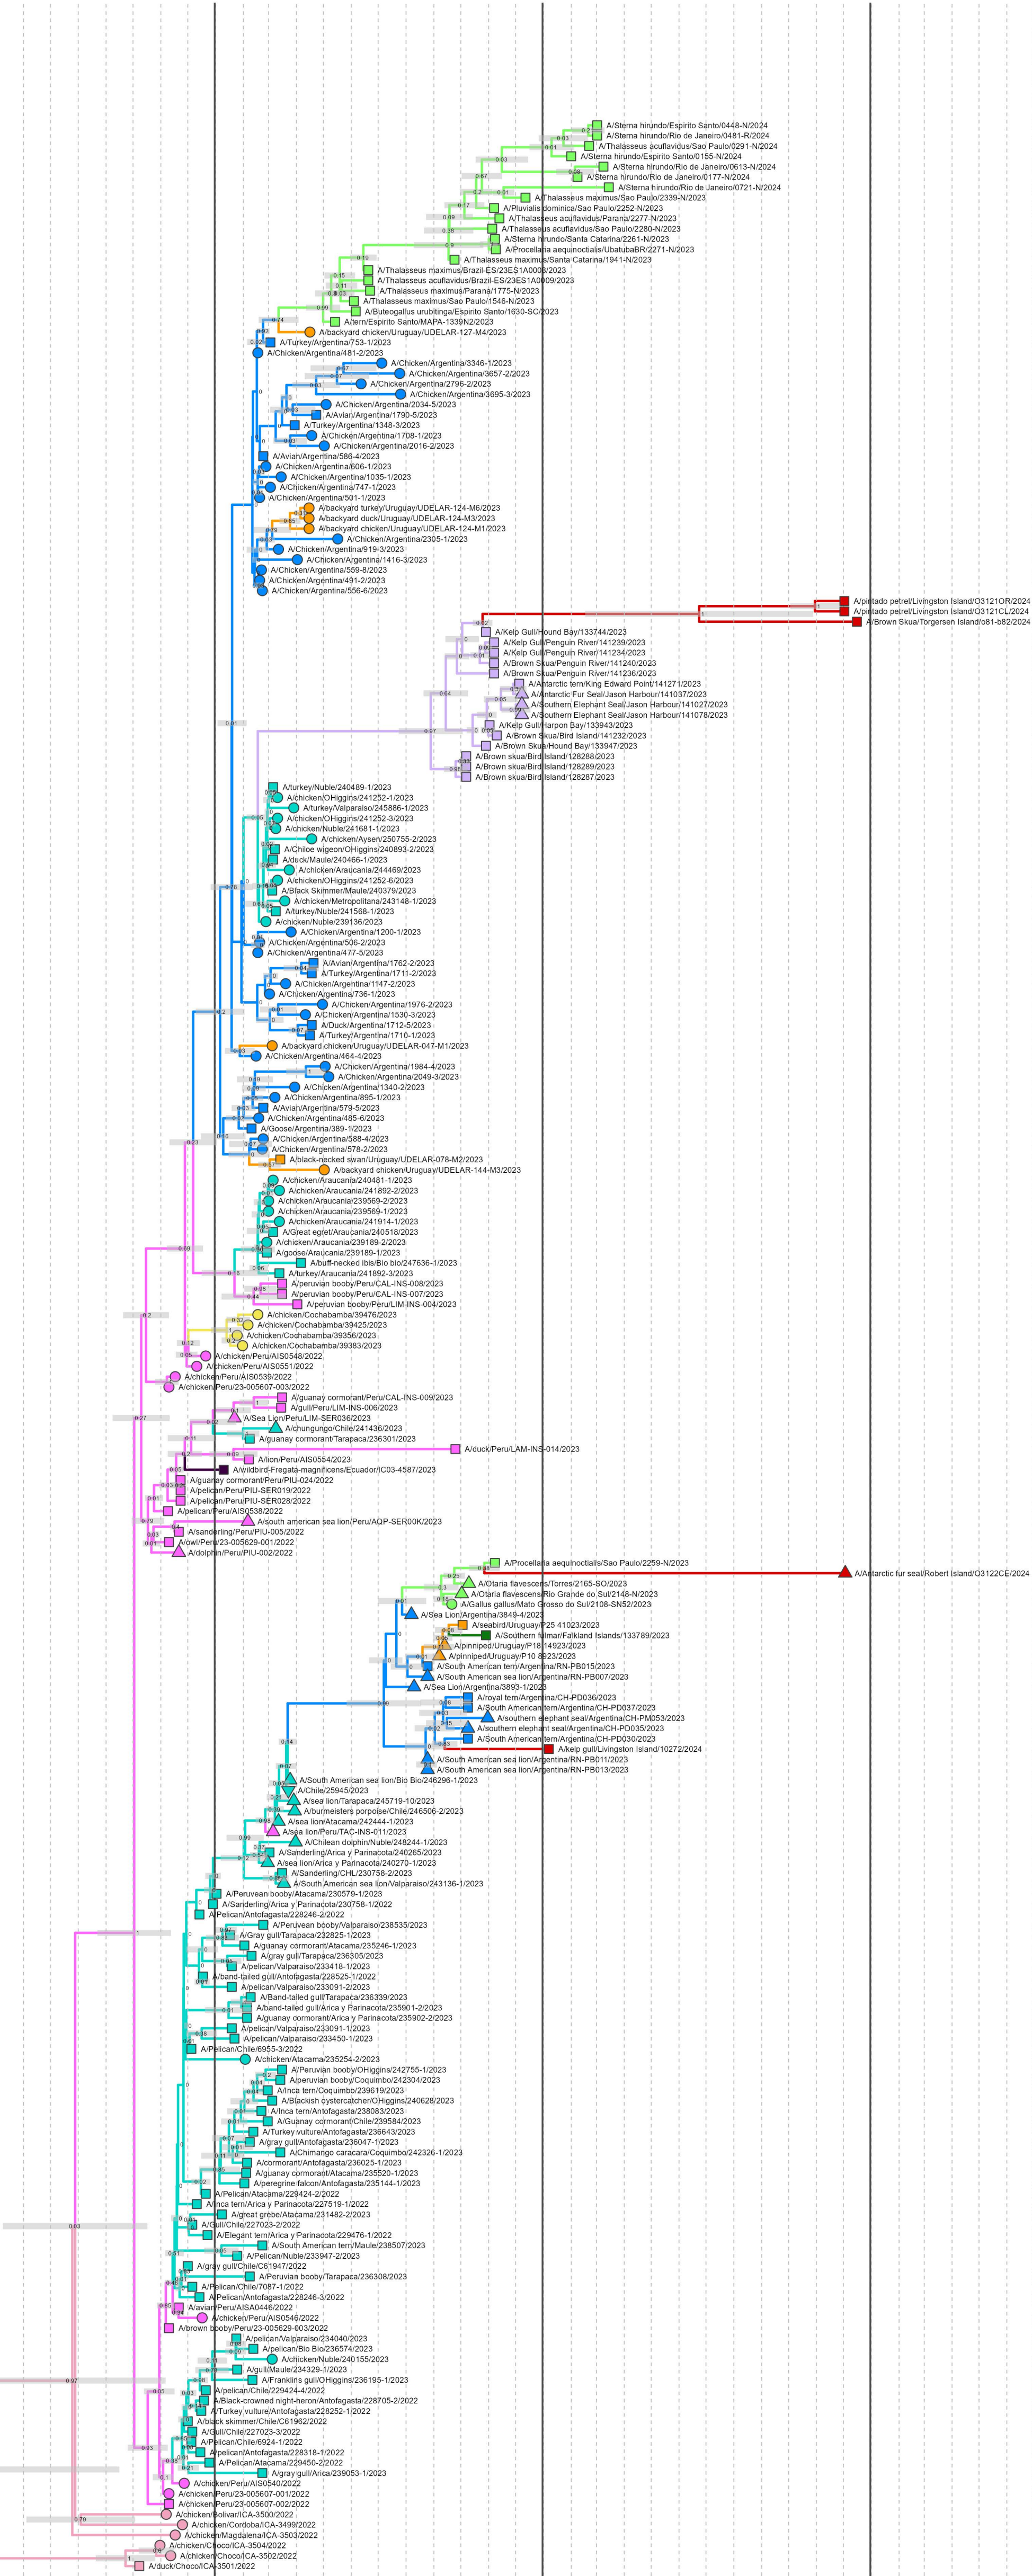

Supplement: Supplementary file 1 [file 38b298ece1bdf3cab156724f.pdf]
