# Supplementary material for: Genomic analysis of high pathogenicity avian influenza viruses from Antarctica reveals multiple introductions from South America
Source: Research Square preprint supplement (doi:10.21203/rs.3.rs-6727501/v1), 2025-06-12
Supplement: Supplementary file 1 [file 8e7de60702f4c42176af67b3.xlsx]

## Sheet: Supplementary File 2
Strain	Site	Host	Date	AccessionPB2	AccessionPB1	AccessionPA	AccessionHA	AccessionNP	AccessionNA	AccessionMP	AccessionNS
A/kelp_gull/Livingston_Island/10272/2024	Antarctica	Wild bird	2024-01-08	10272	10272	10272	10272	10272	10272	10272	10272
A/pintado_petrel/Livingston_Island/O3121CL/2024	Antarctica	Wild bird	2024-12-03	O3121CL	O3121CL	O3121CL	O3121CL	O3121CL	O3121CL	O3121CL	O3121CL
A/pintado_petrel/Livingston_Island/O3121OR/2024	Antarctica	Wild bird	2024-12-03	O3121OR	O3121OR	O3121OR	O3121OR	O3121OR	O3121OR	O3121OR	O3121OR
A/Antarctic_fur_seal/Robert_Island/O3122CE/2024	Antarctica	Wild mammal	2024-12-04	O3122CE	O3122CE	O3122CE	O3122CE	O3122CE	O3122CE	O3122CE	O3122CE
A/Brown_Skua/Torgersen_Island/o81-b82/2024	Antarctica	Wild bird	2024-12-17	EPI_ISL_19645365	EPI_ISL_19645365	EPI_ISL_19645365	EPI_ISL_19645365	EPI_ISL_19645365	EPI_ISL_19645365	EPI_ISL_19645365	EPI_ISL_19645365
A/Avian/Argentina/1762-2/2023	Argentina	Wild bird	2023-04-21	EPI_ISL_18698516	EPI_ISL_18698516	EPI_ISL_18698516	EPI_ISL_18698516	EPI_ISL_18698516	EPI_ISL_18698516	EPI_ISL_18698516	EPI_ISL_18698516
A/Avian/Argentina/1790-5/2023	Argentina	Wild bird	2023-04-24	EPI_ISL_18698517	EPI_ISL_18698517	EPI_ISL_18698517	EPI_ISL_18698517	EPI_ISL_18698517	EPI_ISL_18698517	EPI_ISL_18698517	EPI_ISL_18698517
A/Avian/Argentina/579-5/2023	Argentina	Wild bird	2023-02-24	EPI_ISL_18698485	EPI_ISL_18698485	EPI_ISL_18698485	EPI_ISL_18698485	EPI_ISL_18698485	EPI_ISL_18698485	EPI_ISL_18698485	EPI_ISL_18698485
A/Avian/Argentina/586-4/2023	Argentina	Wild bird	2023-02-24	EPI_ISL_18698487	EPI_ISL_18698487	EPI_ISL_18698487	EPI_ISL_18698487	EPI_ISL_18698487	EPI_ISL_18698487	EPI_ISL_18698487	EPI_ISL_18698487
A/Chicken/Argentina/1035-1/2023	Argentina	Poultry	2023-03-16	EPI_ISL_18698504	EPI_ISL_18698504	EPI_ISL_18698504	EPI_ISL_18698504	EPI_ISL_18698504	EPI_ISL_18698504	EPI_ISL_18698504	EPI_ISL_18698504
A/Chicken/Argentina/1147-2/2023	Argentina	Poultry	2023-03-21	EPI_ISL_18698505	EPI_ISL_18698505	EPI_ISL_18698505	EPI_ISL_18698505	EPI_ISL_18698505	EPI_ISL_18698505	EPI_ISL_18698505	EPI_ISL_18698505
A/Chicken/Argentina/1200-1/2023	Argentina	Poultry	2023-03-27	EPI_ISL_18698506	EPI_ISL_18698506	EPI_ISL_18698506	EPI_ISL_18698506	EPI_ISL_18698506	EPI_ISL_18698506	EPI_ISL_18698506	EPI_ISL_18698506
A/Chicken/Argentina/1340-2/2023	Argentina	Poultry	2023-03-31	EPI_ISL_18698507	EPI_ISL_18698507	EPI_ISL_18698507	EPI_ISL_18698507	EPI_ISL_18698507	EPI_ISL_18698507	EPI_ISL_18698507	EPI_ISL_18698507
A/Chicken/Argentina/1416-3/2023	Argentina	Poultry	2023-04-03	EPI_ISL_18698510	EPI_ISL_18698510	EPI_ISL_18698510	EPI_ISL_18698510	EPI_ISL_18698510	EPI_ISL_18698510	EPI_ISL_18698510	EPI_ISL_18698510
A/Chicken/Argentina/1530-3/2023	Argentina	Poultry	2023-04-12	EPI_ISL_18698511	EPI_ISL_18698511	EPI_ISL_18698511	EPI_ISL_18698511	EPI_ISL_18698511	EPI_ISL_18698511	EPI_ISL_18698511	EPI_ISL_18698511
A/Chicken/Argentina/1708-1/2023	Argentina	Poultry	2023-04-19	EPI_ISL_18698512	EPI_ISL_18698512	EPI_ISL_18698512	EPI_ISL_18698512	EPI_ISL_18698512	EPI_ISL_18698512	EPI_ISL_18698512	EPI_ISL_18698512
A/Chicken/Argentina/1976-2/2023	Argentina	Poultry	2023-05-01	EPI_ISL_18698518	EPI_ISL_18698518	EPI_ISL_18698518	EPI_ISL_18698518	EPI_ISL_18698518	EPI_ISL_18698518	EPI_ISL_18698518	EPI_ISL_18698518
A/Chicken/Argentina/1984-4/2023	Argentina	Poultry	2023-05-04	EPI_ISL_18698519	EPI_ISL_18698519	EPI_ISL_18698519	EPI_ISL_18698519	EPI_ISL_18698519	EPI_ISL_18698519	EPI_ISL_18698519	EPI_ISL_18698519
A/Chicken/Argentina/2016-2/2023	Argentina	Poultry	2023-05-03	EPI_ISL_18698732	EPI_ISL_18698732	EPI_ISL_18698732	EPI_ISL_18698732	EPI_ISL_18698732	EPI_ISL_18698732	EPI_ISL_18698732	EPI_ISL_18698732
A/Chicken/Argentina/2034-5/2023	Argentina	Poultry	2023-05-05	EPI_ISL_18698520	EPI_ISL_18698520	EPI_ISL_18698520	EPI_ISL_18698520	EPI_ISL_18698520	EPI_ISL_18698520	EPI_ISL_18698520	EPI_ISL_18698520
A/Chicken/Argentina/2049-3/2023	Argentina	Poultry	2023-05-08	EPI_ISL_18698521	EPI_ISL_18698521	EPI_ISL_18698521	EPI_ISL_18698521	EPI_ISL_18698521	EPI_ISL_18698521	EPI_ISL_18698521	EPI_ISL_18698521
A/Chicken/Argentina/2305-1/2023	Argentina	Poultry	2023-05-18	EPI_ISL_18698524	EPI_ISL_18698524	EPI_ISL_18698524	EPI_ISL_18698524	EPI_ISL_18698524	EPI_ISL_18698524	EPI_ISL_18698524	EPI_ISL_18698524
A/Chicken/Argentina/2796-2/2023	Argentina	Poultry	2023-06-13	EPI_ISL_18698527	EPI_ISL_18698527	EPI_ISL_18698527	EPI_ISL_18698527	EPI_ISL_18698527	EPI_ISL_18698527	EPI_ISL_18698527	EPI_ISL_18698527
A/Chicken/Argentina/3346-1/2023	Argentina	Poultry	2023-07-06	EPI_ISL_18698528	EPI_ISL_18698528	EPI_ISL_18698528	EPI_ISL_18698528	EPI_ISL_18698528	EPI_ISL_18698528	EPI_ISL_18698528	EPI_ISL_18698528
A/Chicken/Argentina/3657-2/2023	Argentina	Poultry	2023-07-26	EPI_ISL_18698529	EPI_ISL_18698529	EPI_ISL_18698529	EPI_ISL_18698529	EPI_ISL_18698529	EPI_ISL_18698529	EPI_ISL_18698529	EPI_ISL_18698529
A/Chicken/Argentina/3695-3/2023	Argentina	Poultry	2023-07-27	EPI_ISL_18698530	EPI_ISL_18698530	EPI_ISL_18698530	EPI_ISL_18698530	EPI_ISL_18698530	EPI_ISL_18698530	EPI_ISL_18698530	EPI_ISL_18698530
A/Chicken/Argentina/464-4/2023	Argentina	Poultry	2023-02-16	EPI_ISL_18698460	EPI_ISL_18698460	EPI_ISL_18698460	EPI_ISL_18698460	EPI_ISL_18698460	EPI_ISL_18698460	EPI_ISL_18698460	EPI_ISL_18698460
A/Chicken/Argentina/477-5/2023	Argentina	Poultry	2023-02-18	EPI_ISL_18698462	EPI_ISL_18698462	EPI_ISL_18698462	EPI_ISL_18698462	EPI_ISL_18698462	EPI_ISL_18698462	EPI_ISL_18698462	EPI_ISL_18698462
A/Chicken/Argentina/481-2/2023	Argentina	Poultry	2023-02-18	EPI_ISL_18698464	EPI_ISL_18698464	EPI_ISL_18698464	EPI_ISL_18698464	EPI_ISL_18698464	EPI_ISL_18698464	EPI_ISL_18698464	EPI_ISL_18698464
A/Chicken/Argentina/485-6/2023	Argentina	Poultry	2023-02-19	EPI_ISL_18698466	EPI_ISL_18698466	EPI_ISL_18698466	EPI_ISL_18698466	EPI_ISL_18698466	EPI_ISL_18698466	EPI_ISL_18698466	EPI_ISL_18698466
A/Chicken/Argentina/491-2/2023	Argentina	Poultry	2023-02-20	EPI_ISL_18698469	EPI_ISL_18698469	EPI_ISL_18698469	EPI_ISL_18698469	EPI_ISL_18698469	EPI_ISL_18698469	EPI_ISL_18698469	EPI_ISL_18698469
A/Chicken/Argentina/501-1/2023	Argentina	Poultry	2023-02-20	EPI_ISL_18698471	EPI_ISL_18698471	EPI_ISL_18698471	EPI_ISL_18698471	EPI_ISL_18698471	EPI_ISL_18698471	EPI_ISL_18698471	EPI_ISL_18698471
A/Chicken/Argentina/506-2/2023	Argentina	Poultry	2023-02-20	EPI_ISL_18698474	EPI_ISL_18698474	EPI_ISL_18698474	EPI_ISL_18698474	EPI_ISL_18698474	EPI_ISL_18698474	EPI_ISL_18698474	EPI_ISL_18698474
A/Chicken/Argentina/556-6/2023	Argentina	Poultry	2023-02-23	EPI_ISL_18698478	EPI_ISL_18698478	EPI_ISL_18698478	EPI_ISL_18698478	EPI_ISL_18698478	EPI_ISL_18698478	EPI_ISL_18698478	EPI_ISL_18698478
A/Chicken/Argentina/559-8/2023	Argentina	Poultry	2023-02-22	EPI_ISL_18698480	EPI_ISL_18698480	EPI_ISL_18698480	EPI_ISL_18698480	EPI_ISL_18698480	EPI_ISL_18698480	EPI_ISL_18698480	EPI_ISL_18698480
A/Chicken/Argentina/578-2/2023	Argentina	Poultry	2023-02-23	EPI_ISL_18698482	EPI_ISL_18698482	EPI_ISL_18698482	EPI_ISL_18698482	EPI_ISL_18698482	EPI_ISL_18698482	EPI_ISL_18698482	EPI_ISL_18698482
A/Chicken/Argentina/588-4/2023	Argentina	Poultry	2023-02-24	EPI_ISL_18698490	EPI_ISL_18698490	EPI_ISL_18698490	EPI_ISL_18698490	EPI_ISL_18698490	EPI_ISL_18698490	EPI_ISL_18698490	EPI_ISL_18698490
A/Chicken/Argentina/606-1/2023	Argentina	Poultry	2023-02-27	EPI_ISL_18698492	EPI_ISL_18698492	EPI_ISL_18698492	EPI_ISL_18698492	EPI_ISL_18698492	EPI_ISL_18698492	EPI_ISL_18698492	EPI_ISL_18698492
A/Chicken/Argentina/736-1/2023	Argentina	Poultry	2023-03-03	EPI_ISL_18698494	EPI_ISL_18698494	EPI_ISL_18698494	EPI_ISL_18698494	EPI_ISL_18698494	EPI_ISL_18698494	EPI_ISL_18698494	EPI_ISL_18698494
A/Chicken/Argentina/747-1/2023	Argentina	Poultry	2023-03-04	EPI_ISL_18698730	EPI_ISL_18698730	EPI_ISL_18698730	EPI_ISL_18698730	EPI_ISL_18698730	EPI_ISL_18698730	EPI_ISL_18698730	EPI_ISL_18698730
A/Chicken/Argentina/895-1/2023	Argentina	Poultry	2023-03-09	EPI_ISL_18698731	EPI_ISL_18698731	EPI_ISL_18698731	EPI_ISL_18698731	EPI_ISL_18698731	EPI_ISL_18698731	EPI_ISL_18698731	EPI_ISL_18698731
A/Chicken/Argentina/919-3/2023	Argentina	Poultry	2023-03-13	EPI_ISL_18698502	EPI_ISL_18698502	EPI_ISL_18698502	EPI_ISL_18698502	EPI_ISL_18698502	EPI_ISL_18698502	EPI_ISL_18698502	EPI_ISL_18698502
A/Duck/Argentina/1712-5/2023	Argentina	Wild bird	2023-04-19	EPI_ISL_18698515	EPI_ISL_18698515	EPI_ISL_18698515	EPI_ISL_18698515	EPI_ISL_18698515	EPI_ISL_18698515	EPI_ISL_18698515	EPI_ISL_18698515
A/Goose/Argentina/389-1/2023	Argentina	Wild bird	2023-02-11	EPI_ISL_18698459	EPI_ISL_18698459	EPI_ISL_18698459	EPI_ISL_18698459	EPI_ISL_18698459	EPI_ISL_18698459	EPI_ISL_18698459	EPI_ISL_18698459
A/royal_tern/Argentina/CH-PD036/2023	Argentina	Wild bird	2023-10-10	EPI_ISL_19466181	EPI_ISL_19466181	EPI_ISL_19466181	EPI_ISL_19466181	EPI_ISL_19466181	EPI_ISL_19466181	EPI_ISL_19466181	EPI_ISL_19466181
A/Sea_Lion/Argentina/3849-4/2023	Argentina	Wild mammal	2023-08-08	EPI_ISL_18698754	EPI_ISL_18698754	EPI_ISL_18698754	EPI_ISL_18698754	EPI_ISL_18698754	EPI_ISL_18698754	EPI_ISL_18698754	EPI_ISL_18698754
A/Sea_Lion/Argentina/3893-1/2023	Argentina	Wild mammal	2023-08-11	EPI_ISL_18698755	EPI_ISL_18698755	EPI_ISL_18698755	EPI_ISL_18698755	EPI_ISL_18698755	EPI_ISL_18698755	EPI_ISL_18698755	EPI_ISL_18698755
A/South_American_sea_lion/Argentina/RN-PB007/2023	Argentina	Wild mammal	2023-08-26	EPI_ISL_18945319	EPI_ISL_18945319	EPI_ISL_18945319	EPI_ISL_18945319	EPI_ISL_18945319	EPI_ISL_18945319	EPI_ISL_18945319	EPI_ISL_18945319
A/South_American_sea_lion/Argentina/RN-PB011/2023	Argentina	Wild mammal	2023-08-26	EPI_ISL_18945317	EPI_ISL_18945317	EPI_ISL_18945317	EPI_ISL_18945317	EPI_ISL_18945317	EPI_ISL_18945317	EPI_ISL_18945317	EPI_ISL_18945317
A/South_American_sea_lion/Argentina/RN-PB013/2023	Argentina	Wild mammal	2023-08-26	EPI_ISL_18945316	EPI_ISL_18945316	EPI_ISL_18945316	EPI_ISL_18945316	EPI_ISL_18945316	EPI_ISL_18945316	EPI_ISL_18945316	EPI_ISL_18945316
A/South_American_tern/Argentina/CH-PD030/2023	Argentina	Wild bird	2023-10-10	EPI_ISL_19466158	EPI_ISL_19466158	EPI_ISL_19466158	EPI_ISL_19466158	EPI_ISL_19466158	EPI_ISL_19466158	EPI_ISL_19466158	EPI_ISL_19466158
A/South_American_tern/Argentina/CH-PD037/2023	Argentina	Wild bird	2023-10-10	EPI_ISL_19466210	EPI_ISL_19466210	EPI_ISL_19466210	EPI_ISL_19466210	EPI_ISL_19466210	EPI_ISL_19466210	EPI_ISL_19466210	EPI_ISL_19466210
A/South_American_tern/Argentina/RN-PB015/2023	Argentina	Wild bird	2023-08-26	EPI_ISL_18945315	EPI_ISL_18945315	EPI_ISL_18945315	EPI_ISL_18945315	EPI_ISL_18945315	EPI_ISL_18945315	EPI_ISL_18945315	EPI_ISL_18945315
A/southern_elephant_seal/Argentina/CH-PD035/2023	Argentina	Wild mammal	2023-10-10	EPI_ISL_19466183	EPI_ISL_19466183	EPI_ISL_19466183	EPI_ISL_19466183	EPI_ISL_19466183	EPI_ISL_19466183	EPI_ISL_19466183	EPI_ISL_19466183
A/southern_elephant_seal/Argentina/CH-PM053/2023	Argentina	Wild mammal	2023-11-01	EPI_ISL_19466252	EPI_ISL_19466252	EPI_ISL_19466252	EPI_ISL_19466252	EPI_ISL_19466252	EPI_ISL_19466252	EPI_ISL_19466252	EPI_ISL_19466252
A/Turkey/Argentina/1348-3/2023	Argentina	Wild bird	2023-03-31	EPI_ISL_18698508	EPI_ISL_18698508	EPI_ISL_18698508	EPI_ISL_18698508	EPI_ISL_18698508	EPI_ISL_18698508	EPI_ISL_18698508	EPI_ISL_18698508
A/Turkey/Argentina/1710-1/2023	Argentina	Wild bird	2023-04-17	EPI_ISL_18698513	EPI_ISL_18698513	EPI_ISL_18698513	EPI_ISL_18698513	EPI_ISL_18698513	EPI_ISL_18698513	EPI_ISL_18698513	EPI_ISL_18698513
A/Turkey/Argentina/1711-2/2023	Argentina	Wild bird	2023-04-19	EPI_ISL_18698514	EPI_ISL_18698514	EPI_ISL_18698514	EPI_ISL_18698514	EPI_ISL_18698514	EPI_ISL_18698514	EPI_ISL_18698514	EPI_ISL_18698514
A/Turkey/Argentina/753-1/2023	Argentina	Wild bird	2023-03-04	EPI_ISL_18698497	EPI_ISL_18698497	EPI_ISL_18698497	EPI_ISL_18698497	EPI_ISL_18698497	EPI_ISL_18698497	EPI_ISL_18698497	EPI_ISL_18698497
A/chicken/Cochabamba/39356/2023	Bolivia	Poultry	2023-01-26	EPI_ISL_19410267	EPI_ISL_19410267	EPI_ISL_19410267	EPI_ISL_19410267	EPI_ISL_19410267	EPI_ISL_19410267	EPI_ISL_19410267	EPI_ISL_19410267
A/chicken/Cochabamba/39383/2023	Bolivia	Poultry	2023-02-01	EPI_ISL_19410268	EPI_ISL_19410268	EPI_ISL_19410268	EPI_ISL_19410268	EPI_ISL_19410268	EPI_ISL_19410268	EPI_ISL_19410268	EPI_ISL_19410268
A/chicken/Cochabamba/39425/2023	Bolivia	Poultry	2023-02-07	EPI_ISL_19410269	EPI_ISL_19410269	EPI_ISL_19410269	EPI_ISL_19410269	EPI_ISL_19410269	EPI_ISL_19410269	EPI_ISL_19410269	EPI_ISL_19410269
A/chicken/Cochabamba/39476/2023	Bolivia	Poultry	2023-02-18	EPI_ISL_19410271	EPI_ISL_19410271	EPI_ISL_19410271	EPI_ISL_19410271	EPI_ISL_19410271	EPI_ISL_19410271	EPI_ISL_19410271	EPI_ISL_19410271
A/Buteogallus_urubitinga/Espirito_Santo/1630-SC/2023	Brazil	Wild bird	2023-06-07	EPI_ISL_19215175	EPI_ISL_19215175	EPI_ISL_19215175	EPI_ISL_19215175	EPI_ISL_19215175	EPI_ISL_19215175	EPI_ISL_19215175	EPI_ISL_19215175
A/Gallus_gallus/Mato_Grosso_do_Sul/2108-SN52/2023	Brazil	Poultry	2023-09-22	EPI_ISL_19215176	EPI_ISL_19215176	EPI_ISL_19215176	EPI_ISL_19215176	EPI_ISL_19215176	EPI_ISL_19215176	EPI_ISL_19215176	EPI_ISL_19215176
A/Otaria_flavescens/Rio_Grande_do_Sul/2148-N/2023	Brazil	Wild mammal	2023-10-03	EPI_ISL_19215179	EPI_ISL_19215179	EPI_ISL_19215179	EPI_ISL_19215179	EPI_ISL_19215179	EPI_ISL_19215179	EPI_ISL_19215179	EPI_ISL_19215179
A/Otaria_flavescens/Torres/2165-SO/2023	Brazil	Wild mammal	2023-10-11	EPI_ISL_19215180	EPI_ISL_19215180	EPI_ISL_19215180	EPI_ISL_19215180	EPI_ISL_19215180	EPI_ISL_19215180	EPI_ISL_19215180	EPI_ISL_19215180
A/Pluvialis_dominica/Sao_Paulo/2252-N/2023	Brazil	Wild bird	2023-11-08	EPI_ISL_19215181	EPI_ISL_19215181	EPI_ISL_19215181	EPI_ISL_19215181	EPI_ISL_19215181	EPI_ISL_19215181	EPI_ISL_19215181	EPI_ISL_19215181
A/Procellaria_aequinoctialis/Sao_Paulo/2259-N/2023	Brazil	Wild bird	2023-11-09	EPI_ISL_19215182	EPI_ISL_19215182	EPI_ISL_19215182	EPI_ISL_19215182	EPI_ISL_19215182	EPI_ISL_19215182	EPI_ISL_19215182	EPI_ISL_19215182
A/Procellaria_aequinoctialis/UbatubaBR/2271-N/2023	Brazil	Wild bird	2023-11-10	EPI_ISL_19215190	EPI_ISL_19215190	EPI_ISL_19215190	EPI_ISL_19215190	EPI_ISL_19215190	EPI_ISL_19215190	EPI_ISL_19215190	EPI_ISL_19215190
A/Sterna_hirundo/Espirito_Santo/0155-N/2024	Brazil	Wild bird	2024-02-02	EPI_ISL_19215192	EPI_ISL_19215192	EPI_ISL_19215192	EPI_ISL_19215192	EPI_ISL_19215192	EPI_ISL_19215192	EPI_ISL_19215192	EPI_ISL_19215192
A/Sterna_hirundo/Espirito_Santo/0448-N/2024	Brazil	Wild bird	2024-03-02	EPI_ISL_19215194	EPI_ISL_19215194	EPI_ISL_19215194	EPI_ISL_19215194	EPI_ISL_19215194	EPI_ISL_19215194	EPI_ISL_19215194	EPI_ISL_19215194
A/Sterna_hirundo/Rio_de_Janeiro/0177-N/2024	Brazil	Wild bird	2024-02-09	EPI_ISL_19215193	EPI_ISL_19215193	EPI_ISL_19215193	EPI_ISL_19215193	EPI_ISL_19215193	EPI_ISL_19215193	EPI_ISL_19215193	EPI_ISL_19215193
A/Sterna_hirundo/Rio_de_Janeiro/0481-R/2024	Brazil	Wild bird	2024-03-02	EPI_ISL_19215196	EPI_ISL_19215196	EPI_ISL_19215196	EPI_ISL_19215196	EPI_ISL_19215196	EPI_ISL_19215196	EPI_ISL_19215196	EPI_ISL_19215196
A/Sterna_hirundo/Rio_de_Janeiro/0613-N/2024	Brazil	Wild bird	2024-03-09	EPI_ISL_19215191	EPI_ISL_19215191	EPI_ISL_19215191	EPI_ISL_19215191	EPI_ISL_19215191	EPI_ISL_19215191	EPI_ISL_19215191	EPI_ISL_19215191
A/Sterna_hirundo/Rio_de_Janeiro/0721-N/2024	Brazil	Wild bird	2024-03-15	EPI_ISL_19215195	EPI_ISL_19215195	EPI_ISL_19215195	EPI_ISL_19215195	EPI_ISL_19215195	EPI_ISL_19215195	EPI_ISL_19215195	EPI_ISL_19215195
A/Sterna_hirundo/Santa_Catarina/2261-N/2023	Brazil	Wild bird	2023-11-09	EPI_ISL_19215184	EPI_ISL_19215184	EPI_ISL_19215184	EPI_ISL_19215184	EPI_ISL_19215184	EPI_ISL_19215184	EPI_ISL_19215184	EPI_ISL_19215184
A/tern/Espirito_Santo/MAPA-1339N2/2023	Brazil	Wild bird	2023-05-15	EPI_ISL_18755338	EPI_ISL_18755338	EPI_ISL_18755338	EPI_ISL_18755338	EPI_ISL_18755338	EPI_ISL_18755338	EPI_ISL_18755338	EPI_ISL_18755338
A/Thalasseus_acuflavidus/Brazil-ES/23ES1A0009/2023	Brazil	Wild bird	2023-06-21	EPI_ISL_18130622	EPI_ISL_18130622	EPI_ISL_18130622	EPI_ISL_18130622	EPI_ISL_18130622	EPI_ISL_18130622	EPI_ISL_18130622	EPI_ISL_18130622
A/Thalasseus_acuflavidus/Parana/2277-N/2023	Brazil	Wild bird	2023-11-14	EPI_ISL_19215199	EPI_ISL_19215199	EPI_ISL_19215199	EPI_ISL_19215199	EPI_ISL_19215199	EPI_ISL_19215199	EPI_ISL_19215199	EPI_ISL_19215199
A/Thalasseus_acuflavidus/Sao_Paulo/0291-N/2024	Brazil	Wild bird	2024-02-22	EPI_ISL_19215197	EPI_ISL_19215197	EPI_ISL_19215197	EPI_ISL_19215197	EPI_ISL_19215197	EPI_ISL_19215197	EPI_ISL_19215197	EPI_ISL_19215197
A/Thalasseus_acuflavidus/Sao_Paulo/2280-N/2023	Brazil	Wild bird	2023-11-06	EPI_ISL_19215198	EPI_ISL_19215198	EPI_ISL_19215198	EPI_ISL_19215198	EPI_ISL_19215198	EPI_ISL_19215198	EPI_ISL_19215198	EPI_ISL_19215198
A/Thalasseus_maximus/Brazil-ES/23ES1A0008/2023	Brazil	Wild bird	2023-06-21	EPI_ISL_18130597	EPI_ISL_18130597	EPI_ISL_18130597	EPI_ISL_18130597	EPI_ISL_18130597	EPI_ISL_18130597	EPI_ISL_18130597	EPI_ISL_18130597
A/Thalasseus_maximus/Parana/1775-N/2023	Brazil	Wild bird	2023-06-23	EPI_ISL_19215186	EPI_ISL_19215186	EPI_ISL_19215186	EPI_ISL_19215186	EPI_ISL_19215186	EPI_ISL_19215186	EPI_ISL_19215186	EPI_ISL_19215186
A/Thalasseus_maximus/Santa_Catarina/1941-N/2023	Brazil	Wild bird	2023-09-25	EPI_ISL_19215187	EPI_ISL_19215187	EPI_ISL_19215187	EPI_ISL_19215187	EPI_ISL_19215187	EPI_ISL_19215187	EPI_ISL_19215187	EPI_ISL_19215187
A/Thalasseus_maximus/Sao_Paulo/1546-N/2023	Brazil	Wild bird	2023-06-05	EPI_ISL_19215189	EPI_ISL_19215189	EPI_ISL_19215189	EPI_ISL_19215189	EPI_ISL_19215189	EPI_ISL_19215189	EPI_ISL_19215189	EPI_ISL_19215189
A/Thalasseus_maximus/Sao_Paulo/2339-N/2023	Brazil	Wild bird	2023-12-13	EPI_ISL_19215200	EPI_ISL_19215200	EPI_ISL_19215200	EPI_ISL_19215200	EPI_ISL_19215200	EPI_ISL_19215200	EPI_ISL_19215200	EPI_ISL_19215200
A/band-tailed_gull/Antofagasta/228525-1/2022	Chile	Wild bird	2022-12-19	EPI_ISL_19131166	EPI_ISL_19131166	EPI_ISL_19131166	EPI_ISL_19131166	EPI_ISL_19131166	EPI_ISL_19131166	EPI_ISL_19131166	EPI_ISL_19131166
A/band-tailed_gull/Arica_y_Parinacota/235901-2/2023	Chile	Wild bird	2023-02-06	OR910316	OR910317	EPI_ISL_18690736	OR910318	OR910319	OR910320	OR910321	EPI_ISL_18690736
A/Band-tailed_gull/Tarapaca/236339/2023	Chile	Wild bird	2023-02-10	OR910183	OR910184	OR910185	OR910186	OR910187	EPI_ISL_18690676	OR910188	OR910189
A/black_skimmer/Chile/C61962/2022	Chile	Wild bird	2022-12-02	EPI_ISL_16891402	EPI_ISL_16891402	EPI_ISL_16891402	EPI_ISL_16891402	EPI_ISL_16891402	EPI_ISL_16891402	EPI_ISL_16891402	EPI_ISL_16891402
A/Black_Skimmer/Maule/240379/2023	Chile	Wild bird	2023-03-06	EPI_ISL_17885849	EPI_ISL_17885849	EPI_ISL_17885849	EPI_ISL_17885849	EPI_ISL_17885849	EPI_ISL_17885849	EPI_ISL_17885849	EPI_ISL_17885849
A/Black-crowned_night-heron/Antofagasta/228705-2/2022	Chile	Wild bird	2022-12-20	OR125193	EPI_ISL_18005786	OR125194	EPI_ISL_18005786	OR125195	EPI_ISL_18005786	OR125196	OR125197
A/Blackish_oystercatcher/OHiggins/240628/2023	Chile	Wild bird	2023-03-06	EPI_ISL_17885967	EPI_ISL_17885967	EPI_ISL_17885967	EPI_ISL_17885967	EPI_ISL_17885967	EPI_ISL_17885967	EPI_ISL_17885967	EPI_ISL_17885967
A/buff-necked_ibis/Bio_bio/247636-1/2023	Chile	Wild bird	2023-04-07	EPI_ISL_19418491	EPI_ISL_19418491	EPI_ISL_19418491	EPI_ISL_19418491	EPI_ISL_19418491	EPI_ISL_19418491	EPI_ISL_19418491	EPI_ISL_19418491
A/burmeisters_porpoise/Chile/246506-2/2023	Chile	Wild mammal	2023-03-31	EPI_ISL_19391458	EPI_ISL_19391458	EPI_ISL_19391458	EPI_ISL_19391458	EPI_ISL_19391458	EPI_ISL_19391458	EPI_ISL_19391458	EPI_ISL_19391458
A/chicken/Araucania/239189-2/2023	Chile	Poultry	2023-02-28	EPI_ISL_17885958	EPI_ISL_17885958	EPI_ISL_17885958	EPI_ISL_17885958	EPI_ISL_17885958	EPI_ISL_17885958	EPI_ISL_17885958	EPI_ISL_17885958
A/chicken/Araucania/239569-1/2023	Chile	Poultry	2023-03-02	EPI_ISL_17885954	EPI_ISL_17885954	EPI_ISL_17885954	EPI_ISL_17885954	EPI_ISL_17885954	EPI_ISL_17885954	EPI_ISL_17885954	EPI_ISL_17885954
A/chicken/Araucania/239569-2/2023	Chile	Poultry	2023-03-02	EPI_ISL_17885952	EPI_ISL_17885952	EPI_ISL_17885952	EPI_ISL_17885952	EPI_ISL_17885952	EPI_ISL_17885952	EPI_ISL_17885952	EPI_ISL_17885952
A/chicken/Araucania/240481-1/2023	Chile	Poultry	2023-03-07	EPI_ISL_17885949	EPI_ISL_17885949	EPI_ISL_17885949	EPI_ISL_17885949	EPI_ISL_17885949	EPI_ISL_17885949	EPI_ISL_17885949	EPI_ISL_17885949
A/chicken/Araucania/241892-2/2023	Chile	Poultry	2023-03-14	EPI_ISL_17885946	EPI_ISL_17885946	EPI_ISL_17885946	EPI_ISL_17885946	EPI_ISL_17885946	EPI_ISL_17885946	EPI_ISL_17885946	EPI_ISL_17885946
A/chicken/Araucania/241914-1/2023	Chile	Poultry	2023-03-14	EPI_ISL_17885945	EPI_ISL_17885945	EPI_ISL_17885945	EPI_ISL_17885945	EPI_ISL_17885945	EPI_ISL_17885945	EPI_ISL_17885945	EPI_ISL_17885945
A/chicken/Araucania/244469/2023	Chile	Poultry	2023-03-25	EPI_ISL_18760073	EPI_ISL_18760073	EPI_ISL_18760073	EPI_ISL_18760073	EPI_ISL_18760073	EPI_ISL_18760073	EPI_ISL_18760073	EPI_ISL_18760073
A/chicken/Atacama/235254-2/2023	Chile	Poultry	2023-02-04	EPI_ISL_18760074	EPI_ISL_18760074	EPI_ISL_18760074	EPI_ISL_18760074	EPI_ISL_18760074	EPI_ISL_18760074	EPI_ISL_18760074	EPI_ISL_18760074
A/chicken/Aysen/250755-2/2023	Chile	Poultry	2023-04-19	EPI_ISL_19404916	EPI_ISL_19404916	EPI_ISL_19404916	EPI_ISL_19404916	EPI_ISL_19404916	EPI_ISL_19404916	EPI_ISL_19404916	EPI_ISL_19404916
A/chicken/Metropolitana/243148-1/2023	Chile	Poultry	2023-03-20	EPI_ISL_18760060	EPI_ISL_18760060	EPI_ISL_18760060	EPI_ISL_18760060	EPI_ISL_18760060	EPI_ISL_18760060	EPI_ISL_18760060	EPI_ISL_18760060
A/chicken/Nuble/239136/2023	Chile	Poultry	2023-02-27	EPI_ISL_17885878	EPI_ISL_17885878	EPI_ISL_17885878	EPI_ISL_17885878	EPI_ISL_17885878	EPI_ISL_17885878	EPI_ISL_17885878	EPI_ISL_17885878
A/chicken/Nuble/240155/2023	Chile	Poultry	2023-03-06	EPI_ISL_17885877	EPI_ISL_17885877	EPI_ISL_17885877	EPI_ISL_17885877	EPI_ISL_17885877	EPI_ISL_17885877	EPI_ISL_17885877	EPI_ISL_17885877
A/chicken/Nuble/241681-1/2023	Chile	Poultry	2023-03-10	EPI_ISL_17885873	EPI_ISL_17885873	EPI_ISL_17885873	EPI_ISL_17885873	EPI_ISL_17885873	EPI_ISL_17885873	EPI_ISL_17885873	EPI_ISL_17885873
A/chicken/OHiggins/241252-1/2023	Chile	Poultry	2023-03-12	EPI_ISL_17885872	EPI_ISL_17885872	EPI_ISL_17885872	EPI_ISL_17885872	EPI_ISL_17885872	EPI_ISL_17885872	EPI_ISL_17885872	EPI_ISL_17885872
A/chicken/OHiggins/241252-3/2023	Chile	Poultry	2023-03-12	EPI_ISL_17885871	EPI_ISL_17885871	EPI_ISL_17885871	EPI_ISL_17885871	EPI_ISL_17885871	EPI_ISL_17885871	EPI_ISL_17885871	EPI_ISL_17885871
A/chicken/OHiggins/241252-6/2023	Chile	Poultry	2023-03-12	EPI_ISL_17885870	EPI_ISL_17885870	EPI_ISL_17885870	EPI_ISL_17885870	EPI_ISL_17885870	EPI_ISL_17885870	EPI_ISL_17885870	EPI_ISL_17885870
A/Chile/25945/2023	Chile	Human	2023-03-24	EPI_ISL_17468386	EPI_ISL_17468386	EPI_ISL_17468386	EPI_ISL_17468386	EPI_ISL_17468386	EPI_ISL_17468386	EPI_ISL_17468386	EPI_ISL_17468386
A/Chilean_dolphin/Nuble/248244-1/2023	Chile	Wild mammal	2023-04-01	OR960979	OR979669	OR979670	OR960980	OR960981	EPI_ISL_19418490	EPI_ISL_19418490	OR960983
A/Chiloe_wigeon/OHiggins/240893-2/2023	Chile	Wild bird	2023-03-09	EPI_ISL_17885965	EPI_ISL_17885965	EPI_ISL_17885965	EPI_ISL_17885965	EPI_ISL_17885965	EPI_ISL_17885965	EPI_ISL_17885965	EPI_ISL_17885965
A/Chimango_caracara/Coquimbo/242326-1/2023	Chile	Wild bird	2023-03-15	OR910242	EPI_ISL_18690721	EPI_ISL_18690721	OR910243	OR910244	OR910245	OR910246	EPI_ISL_18690721
A/chungungo/Chile/241436/2023	Chile	Wild mammal	2023-03-10	EPI_ISL_19391459	EPI_ISL_19391459	EPI_ISL_19391459	EPI_ISL_19391459	EPI_ISL_19391459	EPI_ISL_19391459	EPI_ISL_19391459	EPI_ISL_19391459
A/cormorant/Antofagasta/236025-1/2023	Chile	Wild bird	2023-02-06	OR910158	EPI_ISL_18690683	OR979544	OR910159	OR910160	EPI_ISL_18690683	EPI_ISL_18690683	OR910161
A/duck/Maule/240466-1/2023	Chile	Wild bird	2023-03-07	EPI_ISL_17885957	EPI_ISL_17885957	EPI_ISL_17885957	EPI_ISL_17885957	EPI_ISL_17885957	EPI_ISL_17885957	OR265622	EPI_ISL_17885957
A/Elegant_tern/Arica_y_Parinacota/229476-1/2022	Chile	Wild bird	2022-12-24	EPI_ISL_17885955	EPI_ISL_17885955	EPI_ISL_17885955	EPI_ISL_17885955	EPI_ISL_17885955	EPI_ISL_17885955	EPI_ISL_17885955	EPI_ISL_17885955
A/Franklins_gull/OHiggins/236195-1/2023	Chile	Wild bird	2023-02-12	EPI_ISL_18939722	EPI_ISL_18939722	EPI_ISL_18939722	EPI_ISL_18939722	EPI_ISL_18939722	EPI_ISL_18939722	EPI_ISL_18939722	EPI_ISL_18939722
A/goose/Araucania/239189-1/2023	Chile	Wild bird	2023-02-28	EPI_ISL_17885869	EPI_ISL_17885869	EPI_ISL_17885869	EPI_ISL_17885869	EPI_ISL_17885869	EPI_ISL_17885869	EPI_ISL_17885869	EPI_ISL_17885869
A/gray_gull/Antofagasta/236047-1/2023	Chile	Wild bird	2023-02-09	OR910369	OR910370	EPI_ISL_18690697	OR910371	OR910372	OR910373	OR910374	EPI_ISL_18690697
A/gray_gull/Arica/239053-1/2023	Chile	Wild bird	2023-02-23	EPI_ISL_19410281	EPI_ISL_19410281	EPI_ISL_19410281	EPI_ISL_19410281	EPI_ISL_19410281	EPI_ISL_19410281	EPI_ISL_19410281	EPI_ISL_19410281
A/gray_gull/Chile/C61947/2022	Chile	Wild bird	2022-12-02	EPI_ISL_16891400	EPI_ISL_16891400	EPI_ISL_16891400	EPI_ISL_16891400	EPI_ISL_16891400	EPI_ISL_16891400	EPI_ISL_16891400	EPI_ISL_16891400
A/Gray_gull/Tarapaca/232825-1/2023	Chile	Wild bird	2023-01-18	EPI_ISL_17885951	EPI_ISL_17885951	EPI_ISL_17885951	EPI_ISL_17885951	EPI_ISL_17885951	EPI_ISL_17885951	EPI_ISL_17885951	EPI_ISL_17885951
A/gray_gull/Tarapaca/236305/2023	Chile	Wild bird	2023-02-11	OR910446	EPI_ISL_18690699	EPI_ISL_18690699	OR910447	OR910448	OR910449	OR910450	OR910451
A/Great_egret/Araucania/240518/2023	Chile	Wild bird	2023-03-07	EPI_ISL_17885950	EPI_ISL_17885950	EPI_ISL_17885950	EPI_ISL_17885950	EPI_ISL_17885950	EPI_ISL_17885950	EPI_ISL_17885950	EPI_ISL_17885950
A/great_grebe/Atacama/231482-2/2023	Chile	Wild bird	2023-01-09	EPI_ISL_19131196	EPI_ISL_19131196	EPI_ISL_19131196	EPI_ISL_19131196	EPI_ISL_19131196	EPI_ISL_19131196	EPI_ISL_19131196	EPI_ISL_19131196
A/guanay_cormorant/Arica_y_Parinacota/235902-2/2023	Chile	Wild bird	2023-02-06	OR961003	OR961004	EPI_ISL_18690773	OR961005	OR961006	EPI_ISL_18690773	OR961007	OR961008
A/guanay_cormorant/Atacama/235246-1/2023	Chile	Wild bird	2023-02-03	OR960996	OR960997	EPI_ISL_18690701	OR960998	OR960999	OR961000	OR961001	OR961002
A/guanay_cormorant/Atacama/235520-1/2023	Chile	Wild bird	2023-02-05	EPI_ISL_19151400	EPI_ISL_19151400	EPI_ISL_19151400	EPI_ISL_19151400	EPI_ISL_19151400	EPI_ISL_19151400	EPI_ISL_19151400	EPI_ISL_19151400
A/Guanay_cormorant/Chile/239584/2023	Chile	Wild bird	2023-03-01	EPI_ISL_19391460	EPI_ISL_19391460	EPI_ISL_19391460	EPI_ISL_19391460	EPI_ISL_19391460	EPI_ISL_19391460	EPI_ISL_19391460	EPI_ISL_19391460
A/guanay_cormorant/Tarapaca/236301/2023	Chile	Wild bird	2023-02-09	OR960990	OR960991	EPI_ISL_18690703	OR960992	OR960993	OR960994	OR960995	EPI_ISL_18690703
A/Gull/Chile/227023-2/2022	Chile	Wild bird	2022-12-07	EPI_ISL_17011964	EPI_ISL_17011964	EPI_ISL_17011964	EPI_ISL_17011964	EPI_ISL_17011964	EPI_ISL_17011964	EPI_ISL_17011964	EPI_ISL_17011964
A/Gull/Chile/227023-3/2022	Chile	Wild bird	2022-12-07	EPI_ISL_17011958	EPI_ISL_17011958	EPI_ISL_17011958	EPI_ISL_17011958	EPI_ISL_17011958	EPI_ISL_17011958	EPI_ISL_17011958	EPI_ISL_17011958
A/gull/Maule/234329-1/2023	Chile	Wild bird	2023-01-26	EPI_ISL_18777130	OR979635	EPI_ISL_18777130	EPI_ISL_18777130	EPI_ISL_18777130	EPI_ISL_18777130	EPI_ISL_18777130	EPI_ISL_18777130
A/Inca_tern/Antofagasta/238083/2023	Chile	Wild bird	2023-02-22	EPI_ISL_19131156	EPI_ISL_19131156	EPI_ISL_19131156	EPI_ISL_19131156	EPI_ISL_19131156	EPI_ISL_19131156	EPI_ISL_19131156	EPI_ISL_19131156
A/Inca_tern/Arica_y_Parinacota/227519-1/2022	Chile	Wild bird	2022-12-12	EPI_ISL_19131159	EPI_ISL_19131159	EPI_ISL_19131159	EPI_ISL_19131159	EPI_ISL_19131159	EPI_ISL_19131159	EPI_ISL_19131159	EPI_ISL_19131159
A/Inca_tern/Coquimbo/239619/2023	Chile	Wild bird	2023-03-01	EPI_ISL_19131162	EPI_ISL_19131162	EPI_ISL_19131162	EPI_ISL_19131162	EPI_ISL_19131162	EPI_ISL_19131162	EPI_ISL_19131162	EPI_ISL_19131162
A/Pelican/Antofagasta/228246-2/2022	Chile	Wild bird	2022-12-15	EPI_ISL_17885934	EPI_ISL_17885934	EPI_ISL_17885934	EPI_ISL_17885934	EPI_ISL_17885934	EPI_ISL_17885934	EPI_ISL_17885934	EPI_ISL_17885934
A/Pelican/Antofagasta/228246-3/2022	Chile	Wild bird	2022-12-15	EPI_ISL_17885931	EPI_ISL_17885931	EPI_ISL_17885931	EPI_ISL_17885931	EPI_ISL_17885931	EPI_ISL_17885931	EPI_ISL_17885931	EPI_ISL_17885931
A/pelican/Antofagasta/228318-1/2022	Chile	Wild bird	2022-12-16	EPI_ISL_17885928	EPI_ISL_17885928	EPI_ISL_17885928	EPI_ISL_17885928	EPI_ISL_17885928	EPI_ISL_17885928	EPI_ISL_17885928	EPI_ISL_17885928
A/Pelican/Atacama/229424-2/2022	Chile	Wild bird	2022-12-22	EPI_ISL_17885927	EPI_ISL_17885927	EPI_ISL_17885927	EPI_ISL_17885927	EPI_ISL_17885927	EPI_ISL_17885927	EPI_ISL_17885927	EPI_ISL_17885927
A/Pelican/Atacama/229450-2/2022	Chile	Wild bird	2022-12-26	EPI_ISL_17885926	EPI_ISL_17885926	EPI_ISL_17885926	EPI_ISL_17885926	EPI_ISL_17885926	EPI_ISL_17885926	EPI_ISL_17885926	EPI_ISL_17885926
A/pelican/Bio_Bio/236574/2023	Chile	Wild bird	2023-02-13	EPI_ISL_18760061	EPI_ISL_18760061	EPI_ISL_18760061	EPI_ISL_18760061	EPI_ISL_18760061	EPI_ISL_18760061	EPI_ISL_18760061	EPI_ISL_18760061
A/pelican/Chile/229424-4/2022	Chile	Wild bird	2022-12-22	EPI_ISL_19391461	EPI_ISL_19391461	EPI_ISL_19391461	EPI_ISL_19391461	EPI_ISL_19391461	EPI_ISL_19391461	EPI_ISL_19391461	EPI_ISL_19391461
A/Pelican/Chile/6924-1/2022	Chile	Wild bird	2022-12-06	EPI_ISL_17011963	EPI_ISL_17011963	EPI_ISL_17011963	EPI_ISL_17011963	EPI_ISL_17011963	EPI_ISL_17011963	EPI_ISL_17011963	EPI_ISL_17011963
A/Pelican/Chile/6955-3/2022	Chile	Wild bird	2022-12-06	EPI_ISL_17011957	EPI_ISL_17011957	EPI_ISL_17011957	EPI_ISL_17011957	EPI_ISL_17011957	EPI_ISL_17011957	EPI_ISL_17011957	EPI_ISL_17011957
A/Pelican/Chile/7087-1/2022	Chile	Wild bird	2022-12-07	EPI_ISL_17012018	EPI_ISL_17012018	EPI_ISL_17012018	EPI_ISL_17012018	EPI_ISL_17012018	EPI_ISL_17012018	EPI_ISL_17012018	EPI_ISL_17012018
A/Pelican/Nuble/233947-2/2023	Chile	Wild bird	2023-01-26	EPI_ISL_17885918	EPI_ISL_17885918	EPI_ISL_17885918	EPI_ISL_17885918	EPI_ISL_17885918	EPI_ISL_17885918	EPI_ISL_17885918	EPI_ISL_17885918
A/pelican/Valparaiso/233091-1/2023	Chile	Wild bird	2023-01-20	EPI_ISL_17885930	EPI_ISL_17885930	EPI_ISL_17885930	EPI_ISL_17885930	EPI_ISL_17885930	EPI_ISL_17885930	EPI_ISL_17885930	EPI_ISL_17885930
A/pelican/Valparaiso/233091-2/2023	Chile	Wild bird	2023-01-20	EPI_ISL_17885956	EPI_ISL_17885956	EPI_ISL_17885956	EPI_ISL_17885956	EPI_ISL_17885956	EPI_ISL_17885956	EPI_ISL_17885956	EPI_ISL_17885956
A/pelican/Valparaiso/233418-1/2023	Chile	Wild bird	2023-01-20	EPI_ISL_17885932	EPI_ISL_17885932	EPI_ISL_17885932	EPI_ISL_17885932	EPI_ISL_17885932	EPI_ISL_17885932	EPI_ISL_17885932	EPI_ISL_17885932
A/pelican/Valparaiso/233450-1/2023	Chile	Wild bird	2023-01-23	EPI_ISL_17885983	EPI_ISL_17885983	EPI_ISL_17885983	EPI_ISL_17885983	EPI_ISL_17885983	EPI_ISL_17885983	EPI_ISL_17885983	EPI_ISL_17885983
A/pelican/Valparaiso/234040/2023	Chile	Wild bird	2023-01-25	EPI_ISL_17885982	EPI_ISL_17885982	EPI_ISL_17885982	EPI_ISL_17885982	EPI_ISL_17885982	EPI_ISL_17885982	EPI_ISL_17885982	EPI_ISL_17885982
A/peregrine_falcon/Antofagasta/235144-1/2023	Chile	Wild bird	2023-02-03	EPI_ISL_19410283	EPI_ISL_19410283	EPI_ISL_19410283	EPI_ISL_19410283	EPI_ISL_19410283	EPI_ISL_19410283	EPI_ISL_19410283	EPI_ISL_19410283
A/Peruvean_booby/Atacama/230579-1/2023	Chile	Wild bird	2023-01-03	EPI_ISL_19139974	EPI_ISL_19139974	EPI_ISL_19139974	EPI_ISL_19139974	EPI_ISL_19139974	EPI_ISL_19139974	EPI_ISL_19139974	EPI_ISL_19139974
A/Peruvean_booby/Valparaiso/238535/2023	Chile	Wild bird	2023-02-24	EPI_ISL_19131163	EPI_ISL_19131163	EPI_ISL_19131163	EPI_ISL_19131163	EPI_ISL_19131163	EPI_ISL_19131163	EPI_ISL_19131163	EPI_ISL_19131163
A/peruvian_booby/Coquimbo/242304/2023	Chile	Wild bird	2023-03-15	EPI_ISL_19410277	EPI_ISL_19410277	EPI_ISL_19410277	EPI_ISL_19410277	EPI_ISL_19410277	EPI_ISL_19410277	EPI_ISL_19410277	EPI_ISL_19410277
A/Peruvian_booby/OHiggins/242755-1/2023	Chile	Wild bird	2023-03-17	EPI_ISL_18760067	EPI_ISL_18760067	EPI_ISL_18760067	EPI_ISL_18760067	EPI_ISL_18760067	EPI_ISL_18760067	EPI_ISL_18760067	EPI_ISL_18760067
A/Peruvian_booby/Tarapaca/236308/2023	Chile	Wild bird	2023-02-09	OR910401	OR910402	OR910403	OR910404	OR910405	EPI_ISL_18690730	OR910406	OR910407
A/Sanderling/Arica_y_Parinacota/230758-1/2022	Chile	Wild bird	2022-12-30	EPI_ISL_17885980	EPI_ISL_17885980	EPI_ISL_17885980	EPI_ISL_17885980	EPI_ISL_17885980	EPI_ISL_17885980	EPI_ISL_17885980	EPI_ISL_17885980
A/Sanderling/Arica_y_Parinacota/240265/2023	Chile	Wild bird	2023-03-03	EPI_ISL_17885978	EPI_ISL_17885978	EPI_ISL_17885978	EPI_ISL_17885978	EPI_ISL_17885978	EPI_ISL_17885978	EPI_ISL_17885978	EPI_ISL_17885978
A/Sanderling/CHL/230758-2/2023	Chile	Wild bird	2023-03-17	EPI_ISL_19404931	EPI_ISL_19404931	EPI_ISL_19404931	EPI_ISL_19404931	EPI_ISL_19404931	EPI_ISL_19404931	EPI_ISL_19404931	EPI_ISL_19404931
A/sea_lion/Arica_y_Parinacota/240270-1/2023	Chile	Wild mammal	2023-03-01	EPI_ISL_17885976	EPI_ISL_17885976	EPI_ISL_17885976	EPI_ISL_17885976	EPI_ISL_17885976	EPI_ISL_17885976	EPI_ISL_17885976	EPI_ISL_17885976
A/sea_lion/Atacama/242444-1/2023	Chile	Wild mammal	2023-03-13	EPI_ISL_19391462	EPI_ISL_19391462	EPI_ISL_19391462	EPI_ISL_19391462	EPI_ISL_19391462	EPI_ISL_19391462	EPI_ISL_19391462	EPI_ISL_19391462
A/sea_lion/Tarapaca/245719-10/2023	Chile	Wild mammal	2023-03-30	EPI_ISL_19410279	EPI_ISL_19410279	EPI_ISL_19410279	EPI_ISL_19410279	EPI_ISL_19410279	EPI_ISL_19410279	EPI_ISL_19410279	EPI_ISL_19410279
A/South_American_sea_lion/Bio_Bio/246296-1/2023	Chile	Wild mammal	2023-03-26	OR910336	OR910337	OR910338	OR979626	OR910339	OR910340	OR910341	OR910342
A/South_American_sea_lion/Valparaiso/243136-1/2023	Chile	Wild mammal	2023-03-19	OR910465	OR910466	OR910467	OR910468	OR910469	OR910470	OR910471	OR910472
A/South_American_tern/Maule/238507/2023	Chile	Wild bird	2023-02-23	EPI_ISL_17885973	EPI_ISL_17885973	EPI_ISL_17885973	EPI_ISL_17885973	EPI_ISL_17885973	EPI_ISL_17885973	EPI_ISL_17885973	EPI_ISL_17885973
A/Turkey_vulture/Antofagasta/228252-1/2022	Chile	Wild bird	2022-12-17	EPI_ISL_17885970	EPI_ISL_17885970	EPI_ISL_17885970	EPI_ISL_17885970	EPI_ISL_17885970	EPI_ISL_17885970	EPI_ISL_17885970	EPI_ISL_17885970
A/Turkey_vulture/Antofagasta/236643/2023	Chile	Wild bird	2023-02-13	OR910259	EPI_ISL_18690735	OR910260	OR910261	OR910262	OR910263	OR910264	OR910265
A/turkey/Araucania/241892-3/2023	Chile	Wild bird	2023-03-14	EPI_ISL_17885966	EPI_ISL_17885966	EPI_ISL_17885966	EPI_ISL_17885966	EPI_ISL_17885966	EPI_ISL_17885966	EPI_ISL_17885966	EPI_ISL_17885966
A/turkey/Nuble/240489-1/2023	Chile	Wild bird	2023-03-07	EPI_ISL_17885964	EPI_ISL_17885964	EPI_ISL_17885964	EPI_ISL_17885964	EPI_ISL_17885964	EPI_ISL_17885964	EPI_ISL_17885964	EPI_ISL_17885964
A/turkey/Nuble/241568-1/2023	Chile	Wild bird	2023-03-10	EPI_ISL_17885962	EPI_ISL_17885962	EPI_ISL_17885962	EPI_ISL_17885962	EPI_ISL_17885962	EPI_ISL_17885962	EPI_ISL_17885962	EPI_ISL_17885962
A/turkey/Valparaiso/245886-1/2023	Chile	Poultry	2023-03-30	EPI_ISL_19410284	EPI_ISL_19410284	EPI_ISL_19410284	EPI_ISL_19410284	EPI_ISL_19410284	EPI_ISL_19410284	EPI_ISL_19410284	EPI_ISL_19410284
A/chicken/Bolivar/ICA-3500/2022	Colombia	Poultry	2022-11-08	EPI_ISL_17353507	EPI_ISL_17353507	EPI_ISL_17353507	EPI_ISL_17353507	EPI_ISL_17353507	EPI_ISL_17353507	EPI_ISL_17353507	EPI_ISL_17353507
A/chicken/Choco/ICA-3502/2022	Colombia	Poultry	2022-11-13	EPI_ISL_17353508	EPI_ISL_17353508	EPI_ISL_17353508	EPI_ISL_17353508	EPI_ISL_17353508	EPI_ISL_17353508	EPI_ISL_17353508	EPI_ISL_17353508
A/chicken/Choco/ICA-3504/2022	Colombia	Poultry	2022-11-01	EPI_ISL_17353509	EPI_ISL_17353509	EPI_ISL_17353509	EPI_ISL_17353509	EPI_ISL_17353509	EPI_ISL_17353509	EPI_ISL_17353509	EPI_ISL_17353509
A/chicken/Cordoba/ICA-3499/2022	Colombia	Poultry	2022-11-26	EPI_ISL_17353510	EPI_ISL_17353510	EPI_ISL_17353510	EPI_ISL_17353510	EPI_ISL_17353510	EPI_ISL_17353510	EPI_ISL_17353510	EPI_ISL_17353510
A/chicken/Magdalena/ICA-3503/2022	Colombia	Poultry	2022-11-18	EPI_ISL_17353838	EPI_ISL_17353838	EPI_ISL_17353838	EPI_ISL_17353838	EPI_ISL_17353838	EPI_ISL_17353838	EPI_ISL_17353838	EPI_ISL_17353838
A/duck/Choco/ICA-3501/2022	Colombia	Wild bird	2022-10-09	EPI_ISL_17353839	EPI_ISL_17353839	EPI_ISL_17353839	EPI_ISL_17353839	EPI_ISL_17353839	EPI_ISL_17353839	EPI_ISL_17353839	EPI_ISL_17353839
A/wildbird-Fregata-magnificens/Ecuador/IC03-4587/2023	Ecuador	Wild bird	2023-01-11	EPI_ISL_17973443	EPI_ISL_17973443	EPI_ISL_17973443	EPI_ISL_17973443	EPI_ISL_17973443	EPI_ISL_17973443	EPI_ISL_17973443	EPI_ISL_17973443
A/Southern_fulmar/Falkland_Islands/133789/2023	Falkland (Malvinas) Islands	Wild bird	2023-10-30	EPI_ISL_18522961	EPI_ISL_18522961	EPI_ISL_18522961	EPI_ISL_18522961	EPI_ISL_18522961	EPI_ISL_18522961	EPI_ISL_18522961	EPI_ISL_18522961
A/avian/Peru/AISA0446/2022	Peru	Wild bird	2022-11-22	EPI_ISL_17805997	EPI_ISL_17805997	EPI_ISL_17805997	EPI_ISL_17805997	EPI_ISL_17805997	EPI_ISL_17805997	EPI_ISL_17805997	EPI_ISL_17805997
A/brown_booby/Peru/23-005629-003/2022	Peru	Wild bird	2022-11-11	EPI_ISL_17660074	EPI_ISL_17660074	EPI_ISL_17660074	EPI_ISL_17660074	EPI_ISL_17660074	EPI_ISL_17660074	EPI_ISL_17660074	EPI_ISL_17660074
A/chicken/Peru/23-005607-001/2022	Peru	Poultry	2022-11-11	EPI_ISL_17660070	EPI_ISL_17660070	EPI_ISL_17660070	EPI_ISL_17660070	EPI_ISL_17660070	EPI_ISL_17660070	EPI_ISL_17660070	EPI_ISL_17660070
A/chicken/Peru/23-005607-002/2022	Peru	Wild bird	2022-11-11	EPI_ISL_17660071	EPI_ISL_17660071	EPI_ISL_17660071	EPI_ISL_17660071	EPI_ISL_17660071	EPI_ISL_17660071	EPI_ISL_17660071	EPI_ISL_17660071
A/chicken/Peru/23-005607-003/2022	Peru	Poultry	2022-11-11	EPI_ISL_17660072	EPI_ISL_17660072	EPI_ISL_17660072	EPI_ISL_17660072	EPI_ISL_17660072	EPI_ISL_17660072	EPI_ISL_17660072	EPI_ISL_17660072
A/chicken/Peru/AIS0539/2022	Peru	Poultry	2022-11-18	EPI_ISL_17805987	EPI_ISL_17805987	EPI_ISL_17805987	EPI_ISL_17805987	EPI_ISL_17805987	EPI_ISL_17805987	EPI_ISL_17805987	EPI_ISL_17805987
A/chicken/Peru/AIS0540/2022	Peru	Poultry	2022-11-28	EPI_ISL_17805988	EPI_ISL_17805988	EPI_ISL_17805988	EPI_ISL_17805988	EPI_ISL_17805988	EPI_ISL_17805988	EPI_ISL_17805988	EPI_ISL_17805988
A/chicken/Peru/AIS0546/2022	Peru	Poultry	2022-12-18	EPI_ISL_17805986	EPI_ISL_17805986	EPI_ISL_17805986	EPI_ISL_17805986	EPI_ISL_17805986	EPI_ISL_17805986	EPI_ISL_17805986	EPI_ISL_17805986
A/chicken/Peru/AIS0548/2022	Peru	Poultry	2022-12-22	EPI_ISL_17805994	EPI_ISL_17805994	EPI_ISL_17805994	EPI_ISL_17805994	EPI_ISL_17805994	EPI_ISL_17805994	EPI_ISL_17805994	EPI_ISL_17805994
A/chicken/Peru/AIS0551/2022	Peru	Poultry	2022-12-12	EPI_ISL_17806001	EPI_ISL_17806001	EPI_ISL_17806001	EPI_ISL_17806001	EPI_ISL_17806001	EPI_ISL_17806001	EPI_ISL_17806001	EPI_ISL_17806001
A/dolphin/Peru/PIU-002/2022	Peru	Wild mammal	2022-11-22	EPI_ISL_18054503	EPI_ISL_18054503	EPI_ISL_18054503	EPI_ISL_18054503	EPI_ISL_18054503	EPI_ISL_18054503	EPI_ISL_18054503	EPI_ISL_18054503
A/duck/Peru/LAM-INS-014/2023	Peru	Wild bird	2023-09-26	EPI_ISL_18497946	EPI_ISL_18497946	EPI_ISL_18497946	EPI_ISL_18497946	EPI_ISL_18497946	EPI_ISL_18497946	EPI_ISL_18497946	EPI_ISL_18497946
A/guanay_cormorant/Peru/CAL-INS-009/2023	Peru	Wild bird	2023-03-17	EPI_ISL_17777530	EPI_ISL_17777530	EPI_ISL_17777530	EPI_ISL_17777530	EPI_ISL_17777530	EPI_ISL_17777530	EPI_ISL_17777530	EPI_ISL_17777530
A/guanay_cormorant/Peru/PIU-024/2022	Peru	Wild bird	2022-11-24	EPI_ISL_18054500	EPI_ISL_18054500	EPI_ISL_18054500	EPI_ISL_18054500	EPI_ISL_18054500	EPI_ISL_18054500	EPI_ISL_18054500	EPI_ISL_18054500
A/gull/Peru/LIM-INS-006/2023	Peru	Wild bird	2023-03-16	EPI_ISL_17777527	EPI_ISL_17777527	EPI_ISL_17777527	EPI_ISL_17777527	EPI_ISL_17777527	EPI_ISL_17777527	EPI_ISL_17777527	EPI_ISL_17777527
A/lion/Peru/AIS0554/2023	Peru	Wild bird	2023-02-08	EPI_ISL_17805999	EPI_ISL_17805999	EPI_ISL_17805999	EPI_ISL_17805999	EPI_ISL_17805999	EPI_ISL_17805999	EPI_ISL_17805999	EPI_ISL_17805999
A/owl/Peru/23-005629-001/2022	Peru	Wild bird	2022-11-11	EPI_ISL_17660073	EPI_ISL_17660073	EPI_ISL_17660073	EPI_ISL_17660073	EPI_ISL_17660073	EPI_ISL_17660073	EPI_ISL_17660073	EPI_ISL_17660073
A/pelican/Peru/AIS0538/2022	Peru	Wild bird	2022-11-10	EPI_ISL_17806000	EPI_ISL_17806000	EPI_ISL_17806000	EPI_ISL_17806000	EPI_ISL_17806000	EPI_ISL_17806000	EPI_ISL_17806000	EPI_ISL_17806000
A/pelican/Peru/PIU-SER019/2022	Peru	Wild bird	2022-11-24	EPI_ISL_18265435	EPI_ISL_18265435	EPI_ISL_18265435	EPI_ISL_18265435	EPI_ISL_18265435	EPI_ISL_18265435	EPI_ISL_18265435	EPI_ISL_18265435
A/pelican/Peru/PIU-SER028/2022	Peru	Wild bird	2022-11-24	EPI_ISL_18265436	EPI_ISL_18265436	EPI_ISL_18265436	EPI_ISL_18265436	EPI_ISL_18265436	EPI_ISL_18265436	EPI_ISL_18265436	EPI_ISL_18265436
A/peruvian_booby/Peru/CAL-INS-007/2023	Peru	Wild bird	2023-03-17	EPI_ISL_17777528	EPI_ISL_17777528	EPI_ISL_17777528	EPI_ISL_17777528	EPI_ISL_17777528	EPI_ISL_17777528	EPI_ISL_17777528	EPI_ISL_17777528
A/peruvian_booby/Peru/CAL-INS-008/2023	Peru	Wild bird	2023-03-17	EPI_ISL_17777529	EPI_ISL_17777529	EPI_ISL_17777529	EPI_ISL_17777529	EPI_ISL_17777529	EPI_ISL_17777529	EPI_ISL_17777529	EPI_ISL_17777529
A/peruvian_booby/Peru/LIM-INS-004/2023	Peru	Wild bird	2023-04-03	EPI_ISL_17777525	EPI_ISL_17777525	EPI_ISL_17777525	EPI_ISL_17777525	EPI_ISL_17777525	EPI_ISL_17777525	EPI_ISL_17777525	EPI_ISL_17777525
A/sanderling/Peru/PIU-005/2022	Peru	Wild bird	2022-11-22	EPI_ISL_18054501	EPI_ISL_18054501	EPI_ISL_18054501	EPI_ISL_18054501	EPI_ISL_18054501	EPI_ISL_18054501	EPI_ISL_18054501	EPI_ISL_18054501
A/Sea_Lion/Peru/LIM-SER036/2023	Peru	Wild mammal	2023-01-23	EPI_ISL_18054502	EPI_ISL_18054502	EPI_ISL_18054502	EPI_ISL_18054502	EPI_ISL_18054502	EPI_ISL_18054502	EPI_ISL_18054502	EPI_ISL_18054502
A/sea_lion/Peru/TAC-INS-011/2023	Peru	Wild mammal	2023-03-07	EPI_ISL_17777532	EPI_ISL_17777532	EPI_ISL_17777532	EPI_ISL_17777532	EPI_ISL_17777532	EPI_ISL_17777532	EPI_ISL_17777532	EPI_ISL_17777532
A/south_american_sea_lion/Peru/AQP-SER00K/2023	Peru	Wild mammal	2023-02-07	EPI_ISL_18265321	EPI_ISL_18265321	EPI_ISL_18265321	EPI_ISL_18265321	EPI_ISL_18265321	EPI_ISL_18265321	EPI_ISL_18265321	EPI_ISL_18265321
A/Antarctic_Fur_Seal/Jason_Harbour/141037/2023	South Georgia	Wild mammal	2023-12-09	EPI_ISL_18742212	EPI_ISL_18742212	EPI_ISL_18742212	EPI_ISL_18742212	EPI_ISL_18742212	EPI_ISL_18742212	EPI_ISL_18742212	EPI_ISL_18742212
A/Antarctic_tern/King_Edward_Point/141271/2023	South Georgia	Wild bird	2023-12-06	EPI_ISL_18742220	EPI_ISL_18742220	EPI_ISL_18742220	EPI_ISL_18742220	EPI_ISL_18742220	EPI_ISL_18742220	EPI_ISL_18742220	EPI_ISL_18742220
A/Brown_skua/Bird_Island/128287/2023	South Georgia	Wild bird	2023-10-08	EPI_ISL_18439562	EPI_ISL_18439562	EPI_ISL_18439562	EPI_ISL_18439562	EPI_ISL_18439562	EPI_ISL_18439562	EPI_ISL_18439562	EPI_ISL_18439562
A/Brown_skua/Bird_Island/128288/2023	South Georgia	Wild bird	2023-10-08	EPI_ISL_18439563	EPI_ISL_18439563	EPI_ISL_18439563	EPI_ISL_18439563	EPI_ISL_18439563	EPI_ISL_18439563	EPI_ISL_18439563	EPI_ISL_18439563
A/Brown_skua/Bird_Island/128289/2023	South Georgia	Wild bird	2023-10-08	EPI_ISL_18439564	EPI_ISL_18439564	EPI_ISL_18439564	EPI_ISL_18439564	EPI_ISL_18439564	EPI_ISL_18439564	EPI_ISL_18439564	EPI_ISL_18439564
A/Brown_Skua/Bird_Island/141232/2023	South Georgia	Wild bird	2023-11-11	EPI_ISL_18742214	EPI_ISL_18742214	EPI_ISL_18742214	EPI_ISL_18742214	EPI_ISL_18742214	EPI_ISL_18742214	EPI_ISL_18742214	EPI_ISL_18742214
A/Brown_Skua/Hound_Bay/133947/2023	South Georgia	Wild bird	2023-10-30	EPI_ISL_18592428	EPI_ISL_18592428	EPI_ISL_18592428	EPI_ISL_18592428	EPI_ISL_18592428	EPI_ISL_18592428	EPI_ISL_18592428	EPI_ISL_18592428
A/Brown_Skua/Penguin_River/141236/2023	South Georgia	Wild bird	2023-11-08	EPI_ISL_18742216	EPI_ISL_18742216	EPI_ISL_18742216	EPI_ISL_18742216	EPI_ISL_18742216	EPI_ISL_18742216	EPI_ISL_18742216	EPI_ISL_18742216
A/Brown_Skua/Penguin_River/141240/2023	South Georgia	Wild bird	2023-11-08	EPI_ISL_18742218	EPI_ISL_18742218	EPI_ISL_18742218	EPI_ISL_18742218	EPI_ISL_18742218	EPI_ISL_18742218	EPI_ISL_18742218	EPI_ISL_18742218
A/Kelp_Gull/Harpon_Bay/133943/2023	South Georgia	Wild bird	2023-11-03	EPI_ISL_18592427	EPI_ISL_18592427	EPI_ISL_18592427	EPI_ISL_18592427	EPI_ISL_18592427	EPI_ISL_18592427	EPI_ISL_18592427	EPI_ISL_18592427
A/Kelp_Gull/Hound_Bay/133744/2023	South Georgia	Wild bird	2023-10-30	EPI_ISL_18592422	EPI_ISL_18592422	EPI_ISL_18592422	EPI_ISL_18592422	EPI_ISL_18592422	EPI_ISL_18592422	EPI_ISL_18592422	EPI_ISL_18592422
A/Kelp_Gull/Penguin_River/141234/2023	South Georgia	Wild bird	2023-11-08	EPI_ISL_18742215	EPI_ISL_18742215	EPI_ISL_18742215	EPI_ISL_18742215	EPI_ISL_18742215	EPI_ISL_18742215	EPI_ISL_18742215	EPI_ISL_18742215
A/Kelp_Gull/Penguin_River/141239/2023	South Georgia	Wild bird	2023-11-08	EPI_ISL_18742217	EPI_ISL_18742217	EPI_ISL_18742217	EPI_ISL_18742217	EPI_ISL_18742217	EPI_ISL_18742217	EPI_ISL_18742217	EPI_ISL_18742217
A/Southern_Elephant_Seal/Jason_Harbour/141027/2023	South Georgia	Wild mammal	2023-12-09	EPI_ISL_18742221	EPI_ISL_18742221	EPI_ISL_18742221	EPI_ISL_18742221	EPI_ISL_18742221	EPI_ISL_18742221	EPI_ISL_18742221	EPI_ISL_18742221
A/Southern_Elephant_Seal/Jason_Harbour/141078/2023	South Georgia	Wild mammal	2023-12-09	EPI_ISL_18742213	EPI_ISL_18742213	EPI_ISL_18742213	EPI_ISL_18742213	EPI_ISL_18742213	EPI_ISL_18742213	EPI_ISL_18742213	EPI_ISL_18742213
A/backyard_chicken/Uruguay/UDELAR-047-M1/2023	Uruguay	Poultry	2023-03-06	EPI_ISL_18310966	EPI_ISL_18310966	EPI_ISL_18310966	EPI_ISL_18310966	EPI_ISL_18310966	EPI_ISL_18310966	EPI_ISL_18310966	EPI_ISL_18310966
A/backyard_chicken/Uruguay/UDELAR-124-M1/2023	Uruguay	Poultry	2023-04-16	EPI_ISL_18310964	EPI_ISL_18310964	EPI_ISL_18310964	EPI_ISL_18310964	EPI_ISL_18310964	EPI_ISL_18310964	EPI_ISL_18310964	EPI_ISL_18310964
A/backyard_chicken/Uruguay/UDELAR-127-M4/2023	Uruguay	Poultry	2023-04-17	EPI_ISL_18310962	EPI_ISL_18310962	EPI_ISL_18310962	EPI_ISL_18310962	EPI_ISL_18310962	EPI_ISL_18310962	EPI_ISL_18310962	EPI_ISL_18310962
A/backyard_chicken/Uruguay/UDELAR-144-M3/2023	Uruguay	Poultry	2023-05-03	EPI_ISL_18310961	EPI_ISL_18310961	EPI_ISL_18310961	EPI_ISL_18310961	EPI_ISL_18310961	EPI_ISL_18310961	EPI_ISL_18310961	EPI_ISL_18310961
A/backyard_duck/Uruguay/UDELAR-124-M3/2023	Uruguay	Poultry	2023-04-16	EPI_ISL_18310960	EPI_ISL_18310960	EPI_ISL_18310960	EPI_ISL_18310960	EPI_ISL_18310960	EPI_ISL_18310960	EPI_ISL_18310960	EPI_ISL_18310960
A/backyard_turkey/Uruguay/UDELAR-124-M6/2023	Uruguay	Poultry	2023-04-16	EPI_ISL_18310959	EPI_ISL_18310959	EPI_ISL_18310959	EPI_ISL_18310959	EPI_ISL_18310959	EPI_ISL_18310959	EPI_ISL_18310959	EPI_ISL_18310959
A/black-necked_swan/Uruguay/UDELAR-078-M2/2023	Uruguay	Wild bird	2023-03-15	EPI_ISL_18310957	EPI_ISL_18310957	EPI_ISL_18310957	EPI_ISL_18310957	EPI_ISL_18310957	EPI_ISL_18310957	EPI_ISL_18310957	EPI_ISL_18310957
A/pinniped/Uruguay/P10_8923/2023	Uruguay	Wild mammal	2023-09-08	EPI_ISL_19070481	EPI_ISL_19070481	EPI_ISL_19070481	EPI_ISL_19070481	EPI_ISL_19070481	EPI_ISL_19070481	EPI_ISL_19070481	EPI_ISL_19070481
A/pinniped/Uruguay/P18_14923/2023	Uruguay	Wild mammal	2023-09-14	EPI_ISL_19070486	EPI_ISL_19070486	EPI_ISL_19070486	EPI_ISL_19070486	EPI_ISL_19070486	EPI_ISL_19070486	EPI_ISL_19070486	EPI_ISL_19070486
A/seabird/Uruguay/P25_41023/2023	Uruguay	Wild bird	2023-10-04	EPI_ISL_19070497	EPI_ISL_19070497	EPI_ISL_19070497	EPI_ISL_19070497	EPI_ISL_19070497	OR912321	EPI_ISL_19070497	EPI_ISL_19070497
