# Supplementary material for: Genomic analysis of high pathogenicity avian influenza viruses from Antarctica reveals multiple introductions from South America
Source: Research Square preprint supplement (doi:10.21203/rs.3.rs-6727501/v1), 2025-06-12
Supplement: Supplementary file 2 [file a756da69df1407eb83f44133.xlsx]

## Sheet: Supplementary File 1
Sample	Date	Species	EnglishName	AgeClass	Site	Latitude	Longitude	Sample	RRT-PCR
10272	2024-01-08	Larus dominicanus	Kelp gull	Adult	Hannah Point, Livingston Island	-62.6544	-60.6133	Cloacal swab	Positive
O3095	2024-12-01	Pygoscelis papua	Gentoo penguin	Adult	Collins Point, Deception Island	-62.9958	-60.5865	Oropharyngeal swab, cloacal swab	Negative
O3121	2024-12-03	Daption capense	Pintado petrel	Adult	Hannah Point, Livingston Island	-62.6535	-60.6116	Oropharyngeal swab, cloacal swab	Positive
O3122	2024-12-04	Arctocephalus gazella	Antarctic fur seal	Juvenile/Adult	Robert Point, Robert Island	-62.4421	-59.3795	Brain tissue, oral swab, nasal swab	Positive
O3123	2024-12-04	Mirounga leonina	Southern elephant seal	Pup	Robert Point, Robert Island	-62.442	-59.3795	Brain tissue	Negative
O3124	2024-12-04	Mirounga leonina	Southern elephant seal	Pup	Robert Point, Robert Island	-62.4418	-59.38	Brain tissue	Negative
O3125	2024-12-04	Arctocephalus gazella	Antarctic fur seal	Juvenile/Adult	Robert Point, Robert Island	-62.44	-59.381	Brain tissue	Negative
